# Supplementary material for: Compositional data analysis and hydrogeochemistry of the Continental Intercalaire aquifer (northwestern Africa): A regional synthesis
Source: Springer Nature journal article supplement (doi:10.1007/s10040-025-02926-y), 2025-07-12
Supplement: MOESM2 [file 10040_2025_2926_MOESM2_ESM.xlsx]

## Sheet: Cover page
Hydrogeology Journal: Electronic supplementary material 2
Compositional data analysis and hydrogeochemistry of the Continental Intercalaire aquifer (northwestern Africa): A regional synthesis
Adel Abdelali1*, Rabah Kechiched2, Slimane Abdeldjabbar Benhamida3,4, Giovanni Mongelli5, Imed Eddine Nezli3, Monica Pondrelli6, Barbara Cavalazzi1,7
A. Abdelali *
adel.abdelali@unibo.it; adelabdelali5@gmail.com
1. Department of Biological, Geological and Environmental Science, University of Bologna, Via Zamboni 67, 40126 Bologna, Italy.
2. Laboratoire des Réservoirs Souterrains: Pétroliers, Gaziers et Aquifères, Université Kasdi Merbah Ouargla, 30000, Algérie.
3. Laboratoire de Géologie du Sahara, Université Kasdi Merbah Ouargla, 30000, Algérie.
4. Agence De Bassin Hydrographique Sahara (ABHS-AGIRE),10, rue du 9 mai 1945 Tazzegrarret BP 660, Ouargla, 30000, Algérie.
5. Department of Sciences, University of Basilicata, Via dell’Ateneo Lucano, 10 85100 Potenza, Italy.
6. International Research School of Planetary Science-IRSPS, Università di Chieti-Pescara, Pescara, Italy.
7. Department of Geology, University of Johannesburg, APK Campus, Auckland Park 2006, Johannesburg, South Africa.
Page 1. Georeferenced piezometric level data
Page 2. Major ions and physiochemical parameters of groundwater in the CI aquifer
Page 3. Stable isotope data for groundwater in the CI aquifer
Page 4. PCA with and without clr transformation, and HCA with clr transformed data (every CAH title represents one excel sheet)
Page 5. The data used to construct the conventional LL diagram
Page 6. The data used to construct the new LL diagram

## Sheet: Page 1
Table S6. Coordinates and Piezometric level of the studied CI drillings in the three countries. X refers to Longitude (Decimal degrees); Y represents Latitude (Decimal degrees); and Z is the piezometric level (m). 1. ANRH (2008).
Source:	ANRH., 2008. Données sur la piézométrie-OSS mécanisme de concertation. Agence Nationale des Ressources Hydrauliques. Direction régionale Sud, Ouargla.
X (DEC DEG)	Y(DEC DEG)	Z (m)	Country	Reference
6.48972	30.4567	315	ALGERIA	1
6.94889	31.3903	310	ALGERIA	1
8.16667	31.1667	300	ALGERIA	1
9.145	31.5917	270	ALGERIA	1
9.18361	31.6592	270	ALGERIA	1
6.095	31.8308	312	ALGERIA	1
6.79	31.1825	314	ALGERIA	1
5.69083	32.5758	320	ALGERIA	1
5.64889	32.2589	325	ALGERIA	1
6.11056	33.2956	290	ALGERIA	1
6.82083	28.1242	348	ALGERIA	1
7.55222	28.4133	350	ALGERIA	1
7.24528	28.6453	340	ALGERIA	1
9.44361	29.9811	337.88	ALGERIA	1
9.37667	29.9867	334	ALGERIA	1
9.36528	30.1389	340	ALGERIA	1
9.37944	29.8853	339.64	ALGERIA	1
6.87806	33.3394	270	ALGERIA	1
7.08667	33.5833	267	ALGERIA	1
5.66806	33.4661	311	ALGERIA	1
5.9475	33.9714	289	ALGERIA	1
2.89111	30.5742	390.8	ALGERIA	1
2.96556	30.0519	389.33	ALGERIA	1
2.96	30.2861	383	ALGERIA	1
2.94472	30.51	386	ALGERIA	1
2.65333	29.9517	391.75	ALGERIA	1
2.74583	29.9761	389.95	ALGERIA	1
3.03583	30.6381	402.2	ALGERIA	1
2.89583	30.6925	401	ALGERIA	1
3.45806	31.0906	410	ALGERIA	1
3.80028	32.3769	405.67	ALGERIA	1
3.73472	32.41		ALGERIA	1
3.69611	32.5972	422.6	ALGERIA	1
3.73278	32.7053	424.35	ALGERIA	1
3.73861	32.8614	425	ALGERIA	1
3.97	32.8356	395	ALGERIA	1
4.49472	32.7669	380	ALGERIA	1
4.50111	32.7944	393	ALGERIA	1
4.22306	32.3925	400	ALGERIA	1
3.93556	32.3386	416.04	ALGERIA	1
3.81806	32.3269	408.2	ALGERIA	1
3.50611	32.5758	454.79	ALGERIA	1
3.82333	32.4339	404.64	ALGERIA	1
3.58139	32.4967	450.19	ALGERIA	1
4.68333	34.3869	348	ALGERIA	1
4.44556	34.1792	376	ALGERIA	1
4.98	34.3992	332	ALGERIA	1
0.233889	27.9233	320	ALGERIA	1
0.336667	27.8447	355.25	ALGERIA	1
1.09444	26.9819	273	ALGERIA	1
0.0522222	26.8269	181	ALGERIA	1
0.216389	26.7144	191.4	ALGERIA	1
0.208333	29.1792	261.15	ALGERIA	1
0.241389	29.1714	274	ALGERIA	1
0.189444	27.2272	278.55	ALGERIA	1
0.0752778	27.1956	279.2	ALGERIA	1
2.36472	27.1978	268.22	ALGERIA	1
10.3889	30.1444	338	LIBYA	1
10.3889	31.1736	312	LIBYA	1
10.6167	31	315	LIBYA	1
10.3736	30.705	330	LIBYA	1
10.8722	30.6081	339	LIBYA	1
9.5	30.1125	345.45	LIBYA	1
11.3833	30.3333	340	LIBYA	1
9.46111	30.1014	320.9	LIBYA	1
9.45833	30.1458	303.45	LIBYA	1
9.51806	30.1861	306.54	LIBYA	1
10.5	30.1756	332	LIBYA	1
14.3175	32.5728	69.83	LIBYA	1
15.1833	31.9667	43	LIBYA	1
15.1839	31.9847	40.83	LIBYA	1
15.15	31.9917	36.89	LIBYA	1
15.1172	31.9853	28.28	LIBYA	1
15.1097	31.9847	14.77	LIBYA	1
15.1494	31.9583	39.85	LIBYA	1
15.1497	31.9333	35.82	LIBYA	1
15.1833	31.95	42.37	LIBYA	1
15.1417	31.2172	57.17	LIBYA	1
15.2589	31.1414	93.41	LIBYA	1
15.2569	31.5917	71.33	LIBYA	1
15.1839	31.2983	72.19	LIBYA	1
15.2139	31.28	70.8	LIBYA	1
15.2292	31.2839	51.82	LIBYA	1
15.0786	31.1586	100	LIBYA	1
15.2275	31.3089	78	LIBYA	1
15.0681	31.1806	104	LIBYA	1
15.2589	31.3689	59	LIBYA	1
15.1028	31.1878	100	LIBYA	1
15.1414	31.22	94	LIBYA	1
15.0847	31.2172	100	LIBYA	1
15.0847	31.1856	101	LIBYA	1
15.1956	31.2739	74	LIBYA	1
15.1956	31.7886	10.75	LIBYA	1
15.2431	31.3339	61	LIBYA	1
15.2742	31.3944	69	LIBYA	1
15.3019	31.4142	51.89	LIBYA	1
15.3231	31.3919	79	LIBYA	1
15.2444	31.4061	71	LIBYA	1
15.1453	31.2106	73.4	LIBYA	1
15.1764	31.2503	88	LIBYA	1
15.1556	31.1556	102	LIBYA	1
15.0944	31.1583	105	LIBYA	1
15.1197	31.1889	109.29	LIBYA	1
15.2278	29.7614	290.98	LIBYA	1
15.2419	29.7642	288.94	LIBYA	1
15.2125	29.6861	293.44	LIBYA	1
15.2108	29.6831	294	LIBYA	1
15.2294	29.7142	290	LIBYA	1
15.2308	29.7656	277	LIBYA	1
15.2575	29.7789	287	LIBYA	1
15.265	29.7944	269.94	LIBYA	1
15.25	29.7244	286	LIBYA	1
15.2369	29.8158	275	LIBYA	1
14.2511	31.8306	113	LIBYA	1
14.1714	31.8278	109	LIBYA	1
14.1269	31.8389	123	LIBYA	1
14.2936	31.8264	118.9	LIBYA	1
14.3778	31.7694	125.31	LIBYA	1
14.4369	31.765	71	LIBYA	1
14.2231	31.8239	118	LIBYA	1
14.2675	31.8336	114	LIBYA	1
14.3278	31.7836	100	LIBYA	1
14.1653	31.7994	120	LIBYA	1
14.7631	31.5194	51	LIBYA	1
14.6661	31.4019	73.56	LIBYA	1
14.6436	31.3811	80.45	LIBYA	1
15.0786	31.1586	115.3	LIBYA	1
14.5	30.9	125	LIBYA	1
14.55	30.9333	123	LIBYA	1
13.9825	31.7303	117	LIBYA	1
14.3072	31.54	104.52	LIBYA	1
14.2519	31.4803	115.35	LIBYA	1
14.3128	31.56	108.93	LIBYA	1
14.2839	31.5317	113.74	LIBYA	1
14.3825	31.5606	101.55	LIBYA	1
14.3894	31.5533	109.77	LIBYA	1
14.2667	31.5	116.37	LIBYA	1
14.6733	31.6475	66.55	LIBYA	1
14.5086	31.7364	74	LIBYA	1
14.4864	31.7381	67	LIBYA	1
14.6658	31.6664	69.2	LIBYA	1
13.7333	31.4	194.51	LIBYA	1
13.3775	31.4	233.22	LIBYA	1
14.0167	31.7	126	LIBYA	1
14.0167	31.7333	126	LIBYA	1
14.0833	31.7	125	LIBYA	1
14.1333	31.6667	114	LIBYA	1
14.0239	31.7578	125	LIBYA	1
14.0167	31.75	127	LIBYA	1
13.9825	31.7517	130	LIBYA	1
14.0028	31.7728	128	LIBYA	1
14	31.8333	125	LIBYA	1
13.9917	31.6722	129	LIBYA	1
13.9825	31.7303	130	LIBYA	1
13.9958	31.7719	128	LIBYA	1
14.1008	31.8286	115	LIBYA	1
14.0358	31.7558	126	LIBYA	1
14.7878	32.1781	45.34	LIBYA	1
15.5728	31.3089	56.29	LIBYA	1
15.5717	31.3294	58	LIBYA	1
15.5708	31.2769	60	LIBYA	1
15.5822	31.2769	59	LIBYA	1
15.3128	30.8258	132	LIBYA	1
15.3033	30.8317	136	LIBYA	1
15.9125	30.5756	157	LIBYA	1
15.5542	30.5981	160	LIBYA	1
15.2481	30.8286	158	LIBYA	1
15.7419	31.2628	64	LIBYA	1
14.8681	31.7947	8.3	LIBYA	1
15.6203	30.5803	153	LIBYA	1
9.66459	33.9312	34	TUNISIA	1
8.11833	33.9244	216	TUNISIA	1
8.09988	33.9149	205	TUNISIA	1
8.08818	33.9149	219	TUNISIA	1
7.87622	33.8866	230	TUNISIA	1
8.25603	34.0229	208	TUNISIA	1
8.18133	33.9905	221	TUNISIA	1
8.18151	33.9899	204	TUNISIA	1
8.16198	33.9698	213	TUNISIA	1
8.98687	33.7012	117	TUNISIA	1
9.6358	32.8323	189	TUNISIA	1
9.25867	33.7863	53	TUNISIA	1
8.69975	33.7323	160	TUNISIA	1
8.88876	33.7953	147	TUNISIA	1
9.81129	34.063	167.3	TUNISIA	1
8.84376	33.3993	143.7	TUNISIA	1
8.65476	33.3633	140	TUNISIA	1
8.77176	33.8047	154	TUNISIA	1
10.138	32.606	272	TUNISIA	1
9.8311	33.9033	92.2	TUNISIA	1
8.79381	33.7926	151.5	TUNISIA	1
9.57279	33.8943	61.9	TUNISIA	1
9.28686	31.5789	260.5	TUNISIA	1
9.28689	31.5789	259.3	TUNISIA	1
9.23395	31.6578	254.4	TUNISIA	1
9.2344	31.6462	256.3	TUNISIA	1
10.1489	30.9788	320	TUNISIA	1
10.2271	32.0601	325	TUNISIA	1
10.0422	32.2037	323	TUNISIA	1
9.66661	32.4999	255.4	TUNISIA	1
10.3491	31.7695	300.7	TUNISIA	1
10.2065	30.9517	320	TUNISIA	1
10.1326	31.4896	300	TUNISIA	1
9.85186	32.0892	275.5	TUNISIA	1
10.1362	33.1554	273.2	TUNISIA	1
9.43627	32.1692	263.4	TUNISIA	1
9.98541	30.7162	326.8	TUNISIA	1
9.90847	31.9178	275	TUNISIA	1
10.2154	32.0191	296.3	TUNISIA	1
9.67156	33.9123	17	TUNISIA	1
9.63129	33.8956	32.1	TUNISIA	1
9.64435	32.9961	163.7	TUNISIA	1
8.86266	33.784	132.3	TUNISIA	1
9.03637	33.4474	122	TUNISIA	1
9.03097	33.802	95.9	TUNISIA	1
9.7618	33.735	184.9	TUNISIA	1
8.67276	33.3903	122.5	TUNISIA	1
8.73576	33.6783	114.7	TUNISIA	1
7.59451	33.7547	163	TUNISIA	1
9.01657	33.5545	148.5	TUNISIA	1
8.85546	33.7863	35.7	TUNISIA	1
8.99587	33.6468	37	TUNISIA	1
8.81496	33.7926	24.9	TUNISIA	1
8.80371	33.7908	135	TUNISIA	1
9.08452	33.7795	38.2	TUNISIA	1
9.25886	33.7422	35	TUNISIA	1
7.87487	33.887	103	TUNISIA	1
10.1535	33.2193	253	TUNISIA	1
8.20473	34.0058	96	TUNISIA	1
8.20494	34.006	97	TUNISIA	1
8.27718	34.0202	57	TUNISIA	1
8.28393	34.0267	68	TUNISIA	1
9.08217	32.611	221	TUNISIA	1
9.09153	31.0196	263	TUNISIA	1

## Sheet: Page 2
Table S7. Major ions and Physico-chemical parameters of the CI aquifer (units are in méq/L). 1. Hakimi et al (2021). 2. Darling et al (2018). 3. Edmunds et al. (2003). 4. Moulla et al. (2012). 5. Abdelali et al. (2020). 6. Cherchali et al. (2021).
References
1	Hakimi, Y., Orban, P., Deschamps, P., Brouyere, S., 2021. Hydrochemical and isotopic characteristics of groundwater in the Continental Intercalaire aquifer system: Insights from Mzab Ridge and surrounding regions, North of the Algerian Sahara. Journal of Hydrology: Regional Studies 34, 100791. https://doi.org/10.1016/j.ejrh.2021.100791
2	Darling, W.G., Sorensen, J.P.R., Newell, A.J., Midgley, J., Benhamza, M., 2018. The age and origin of groundwater in the Great Western Erg sub-basin of the North-Western Sahara aquifer system: Insights from Krechba, central Algeria. Applied Geochemistry 96, 277–286. https://doi.org/10.1016/j.apgeochem.2018.07.016
3	Edmunds, W.M., Guendouz, A.H., Mamou, A., Moulla, A., Shand, P., Zouari, K., 2003. Groundwater evolution in the Continental Intercalaire aquifer of southern Algeria and Tunisia: trace element and isotopic indicators. Applied Geochemistry 18, 805–822. https://doi.org/10.1016/S0883-2927(02)00189-0
4	Moulla, A.S., Guendouz, A., Cherchali, M.E.-H., Chaid, Z., Ouarezki, S., 2012. Updated geochemical and isotopic data from the Continental Intercalaire aquifer in the Great Occidental Erg sub-basin (south-western Algeria). Quaternary International 257, 64–73. https://doi.org/10.1016/j.quaint.2011.08.038
5	Abdelali, A., Nezli, I.E., Kechiched, R., Attalah, S., Benhamida, S.A., Pang, Z., 2020. Geothermometry and geochemistry of groundwater in the Continental Intercalaire aquifer, southeastern Algeria: Insights from cations, silica and SO4–H2O isotope geothermometers. Applied Geochemistry 113, 104492. https://doi.org/10.1016/j.apgeochem.2019.104492
6	Cherchali, M.E.-H., Moulla, A.S., Amrous, K., Ouarezki, S.-A., Rezka, A., Daas, N., 2021. The Continental Intercalaire groundwaters of the Tidikelt (In-Salah region, Algeria). Hydrochemical and isotopic features. Isotopes in Environmental and Health Studies 57, 217–235. https://doi.org/10.1080/10256016.2021.1875221
Sample	Ca2+	Mg2+	Na+	K+	Cl−	SO42−	HCO3−	NO3−	T°C	EC(µs/cm)	pH	Reference	Area covered	Location
Gl01	3.3105	1.70477	1.33	0.186154	1.84901	2.83115	1.46787	0.276452	33.8	659.1	7.8	1	S. M'zab dorsal & Tademaït	El Golea
Gl02	2.939	1.76398	1.20261	0.164872	1.83465	2.40641	1.48885	0.30871	32.4	622.5	7.8	1	S. M'zab dorsal & Tademaït
Gl03	3.3955	1.98602	1.10217	0.173846	1.55042	3.31564	1.54705	0.243226	31.3	658.2	7.9	1	S. M'zab dorsal & Tademaït
Gl04	3.6185	2.01974	1.05652	0.185641	1.32789	3.68811	1.64721	0.228871	32.1	676.3	7.8	1	S. M'zab dorsal & Tademaït
Gl05	2.6345	1.15789	1.18174	0.147179	1.78986	1.77077	1.2718	0.249355	31.7	537.9	7.7	1	S. M'zab dorsal & Tademaït
Gl06	2.6985	1.18668	1.27261	0.148205	1.66056	2.05101	1.30754	0.254032	31	551.1	7.9	1	S. M'zab dorsal & Tademaït
Gl07	2.3965	1.06661	1.21087	0.134103	1.56056	1.67624	1.27164	0.255323	29.3	501.2	7.7	1	S. M'zab dorsal & Tademaït
Gl08	2.72	1.39309	1.13217	0.157692	1.50761	2.30065	1.37066	0.261935	31.4	556.5	7.8	1	S. M'zab dorsal & Tademaït
Gl09	2.634	1.12336	1.27826	0.145128	1.71465	1.88424	1.29033	0.298548	32.1	539.6	7.8	1	S. M'zab dorsal & Tademaït
Gl10	1.967	0.995066	1.30478	0.150256	0.520845	1.93233	1.74443	0.248065	28.7	446.6	7.9	1	S. M'zab dorsal & Tademaït
Gl11	1.5365	0.689145	1.23304	0.124615	0.354648	1.21362	1.72557	0.244677	29.1	357.7	7.9	1	S. M'zab dorsal & Tademaït
Gl12	1.45	0.614309	2.31261	0.119231	0.61831	0.546533	3.06836	0.165484	24.9	426.9	8	1	S. M'zab dorsal & Tademaït
Gl13	1.9775	0.797697	2.97913	0.144359	0.971831	0.803248	3.88377	0.137903	25.8	557.3	7.9	1	S. M'zab dorsal & Tademaït
Gl14	1.5195	0.587171	1.56913	0.120256	0.550986	0.716011	2.25902	0.194032	28	371.8	7.9	1	S. M'zab dorsal & Tademaït
Hg01	1.4315	0.672697	1.18913	0.112308	0.323099	1.07162	1.72016	0.217097	27.2	340.5	8	1	S. M'zab dorsal & Tademaït	Hassi Gara
Hg02	9.2525	2.05263	1.98087	0.404103	2.61521	8.23902	1.73	0.934032	27.1	1281.5	7.7	1	S. M'zab dorsal & Tademaït
Hg03	2.56	0.984375	1.32478	0.150256	1.85521	1.58568	1.31098	0.274839	29.1	540.9	7.8	1	S. M'zab dorsal & Tademaït
Hg04	2.2525	1.18174	1.11522	0.155128	1.59352	1.45388	1.42869	0.265161	29	502.8	7.8	1	S. M'zab dorsal & Tademaït
Hg05	2.186	1.12664	1.01522	0.150256	1.39803	1.33375	1.46869	0.264839	30.4	475.1	7.8	1	S. M'zab dorsal & Tademaït
kb602	0.72	3.53618	1.69565	0.180769	1.79718	1.21174	1.4541	0.0782258	33.7	534	8	2	S. M'zab dorsal & Tademaït	Krechba
kb603	0.875	3.19079	2.2087	0.178462	2.30141	1.29919	1.50328	0.0867742	33.2	602	8	2	S. M'zab dorsal & Tademaït
kb604	0.625	2.8125	1.33478	0.145128	1.30423	1.04102	1.39016	0.0687097	35.6	458	7.9	2	S. M'zab dorsal & Tademaït
kb605	0.675	3.03454	1.45217	0.153846	1.39155	1.10556	1.44754	0.0679032	34.9	477	7.9	2	S. M'zab dorsal & Tademaït
kb606	0.68	3.20724	1.61304	0.16359	1.85915	1.22423	1.42295	0.0796774	33.7	533	8	2	S. M'zab dorsal & Tademaït
El-Assafia 1	9.25	5.34539	3.16957	0.230769	4.47887	10.6808	2.7541	0.0241935	20.6	1650	7.32	3	Atlas mt	Atlas mt
Djebel Makrane (U1)	18.05	8.06743	6.73913	0.215385	6.59155	22.6941	3.44262	0.0483871	29.1	2810	7.28	3	Atlas mt	Recharge
LAG 01	3.455	7.42599	3.96087	0.2	4.98028	10.0854	1.03279	0.322581	19.3	1445	7.5	4	Atlas mt
LAG 02	1.975	1.34868	1.81739	0.128205	0.476056	2.35478	2.37705	0.159677	23.3	565	7.4	4	Atlas mt
LAG 03	8.945	6.80099	10.9435	0.0897436	11.7606	13.7248	2.60656	0.427419	25.1	2550		4	Atlas mt	Atlas mt
LAG 04	22.955	11.8914	4.7087	0.412821	1.42254	40.202	2.72131	0.858065	24.9	2946	6.9	4	Atlas mt	recharge
LAG 05	4.285	3.03454	2.15652	0.158974	1.98028	4.53675	2.98361	0.153226	23.6	862	7.2	4	Atlas mt
LAG 06	8.44	8.05099	4.31304	0.392308	4.45915	15.6486	1.95082	0.18871	24.6	1970	7.3	4	Atlas mt
LAG 07	7.4	7.08882	2.98696	0.102564	4.2338	11.3408	2.08197	0.217742	22.3	1690	7.1	4	Atlas mt
LAG 08	5.065	3.82401	1.28696	0.133333	1.52113	5.69019	2.44262	0.593548	23.2	937	7.3	4	Atlas mt
LAG 09	6.315	7.90296	3.27826	0.115385	5.02535	8.27816	2.34426	0.333871	23.7	1578	7.3	4	Atlas mt	Laghouat
LAG 10	8.64	8.36349	4.9087	0.102564	2.84789	14.3973	3.22951	0.258065	20.8	1869	7.1	4	Atlas mt
LAG 11	16.78	23.4786	16.9087	0.0897436	27.2113	30.2519	2.29508	2.87419	21.3	5120	7.2	4	Atlas mt
LAG 12	9.08	7.30263	18.5043	0.110256	23.1437	13.3146	1.80328	0.63871	19.6	3600	7.3	4	Atlas mt
LAG 13	8.295	7.02303	17.7478	0.0923077	22.0592	11.2617	2.16393	0.485484	19.4	3570	7.4	4	Atlas mt
LAG 14	2.78	1.10197	0.352174	0.133333	0.442254	0.691235	2.39344	0.743548	20.1	513	7.2	4	Atlas mt
LAG 15	9.855	6.57895	5.75217	0.0871795	7.89577	14.3723	1.86885	0.753226	21.2	2170	7.1	4	Atlas mt
LAG 16	16.245	9.05428	7.31304	0.182051	10.6507	18.3594	5.31148	2.0629	21.2	2870	7.2	4	Atlas mt
LAG 17	12.57	12.9194	9.16522	0.307692	10.5155	22.0321	2.11475	5.11452	24.1	2900	7.3	4	Atlas mt
LAG 18	13.35	10.699	7.7087	0.110256	8.19155	23.9121	2.13115	0.2	19.1	2850	6.9	4	Atlas mt
LAG 19	7.01	6.39803	6.46957	0.230769	9.47606	9.84801	2.5082	0.132258	30.3	2090	6.9	4	Transition	Hassi R'mel
LAG 20	5.005	1.98191	0.656522	0.123077	2.68732	1.599	3.72131	0.656452	19.6	803	7.2	4	Transition
LAG 23	4.975	3.98026	3.78261	0.184615	3.82817	5.81928	3.39344	1.18387	24.6	1321	7.3	4	Transition
LAG 24	3.92	3.23191	2.65217	0.130769	1.82535	3.44368	4.04918	0.783871	26.3	1009	7.2	4	Transition
Elm 01	2.675	6.86678	2.88261	0.225641	3.77465	1.59484	1.44262	0.23871	28	848	7.8	4	S. M'zab dorsal & Tademaït	El Golea
Elm 02	1.415	0.542763	1.5	0.148718	0.349296	0.551738	2.29508	0.174194	27.3	339	7.8	4	S. M'zab dorsal & Tademaït
Tim 01	3.26	2.59868	7.78261	0.648718	6.56338	4.15574	2.01639	0.264516	25.4	1277	7.7	4	Touat and Gourara
Tim 02	8.025	9.62171	21.9478	2.34359	6.21127	11.0264	1.77049	1.38548	24.4	3170	7.7	4	Touat and Gourara
Tim 03	5.815	7.55757	16.2522	1.85897	19.0366	7.91589	1.59016	1.20323	18.9	2870	8.1	4	Touat and Gourara
Tim 04	3.16	3.42928	8.10435	0.551282	7.12394	3.92879	2.81967	0.366129	25	1439	7.8	4	Touat and Gourara
Tim 05	10.45	3.24836	12.0783	0.771795	9.71268	12.3444	1.55738	0.609677	26.8	2220	7.4	4	Touat and Gourara
Tim 06	5.49	2.46711	4.32609	0.594872	5.54366	4.28899	2.08197	0.516129	21.7	1189	7.5	4	Touat and Gourara
Tim 07	2.955	1.69408	2.28696	0.251282	2.19437	5.98376	2.45902	0.325806	23.5	666	7.6	4	Touat and Gourara
Tim 08	8.76	8.16612	27.8783	1.72821	24.3718	14.4993	3.7541	1.98226	24	3990	7.3	4	Touat and Gourara
Tim 09	5.125	4.27632	15.4	1.1	13	6.86446	3.52459	1.29032	23.6	2410	7.4	4	Touat and Gourara
Tim 10	19.275	17.1053	31.4957	3.28205	45.2958	17.1268	4.96721	1.07258	23.6	5690	7.2	4	Touat and Gourara
Tim 11	5.605	4.01316	7.65652	0.961538	8.7493	15.153	1.45902	0.617742	19.9	1561	7.9	4	Touat and Gourara	Timimoun
Tim 12	5.42	3.53618	8.46522	1	9.05634	5.96086	1.91803	0.556452	26.4	1709	7.6	4	Touat and Gourara
Tim 13	3.705	3.73355	8.22174	1.08462	6.90704	4.64918	3.57377	0.266129	24.8	1481	7.5	4	Touat and Gourara
Tim 14	4.385	3.36349	4.50435	0.851282	6.32394	2.65875	1.78689	1.35	21.9	1213	7.7	4	Touat and Gourara
Tim 15	5.835	6.04441	14.4565	2.52308	14.8028	7.87633	3.18033	1.49677	24.3	2630	7.5	4	Touat and Gourara
Tim 16	10.265	7.57401	14.3609	1.31538	17.8535	12.3402	1.4918	1.66935	23.7	2900	7.7	4	Touat and Gourara
Tim 17	2.935	1.15954	6.08696	0.384615	5.10423	3.25213	1.27869	0.256452	17.6	974	8.1	4	Touat and Gourara
Tim 18	11.15	4.5148	13.1087	0.425641	11.7042	12.8045	2.13115	0.874194	26.4	2510	7.6	4	Touat and Gourara
Tim 19	5.77	2.35197	5.33043	0.323077	7.49296	3.67687	1.70492	0.359677	26.1	1291	7.7	4	Touat and Gourara
Tim 20	2.71	1.35691	22.3087	0.592308	15.5746	8.76119	0.163934	0.440323	16.3	2410	8	4	Touat and Gourara
Tim 21	15.51	5.47697	20.7348	1.27436	16.6225	22.4568	1.52459	1.22097	24.7	3490	7.7	4	Touat and Gourara
Adr 01	4.03	3.33059	8.26087	0.533333	7.55493	5.19051	3	0.337097	14.5	1455	8.1	4	Touat and Gourara	Adrar
Adr 02	5.45	4.32566	23.2696	0.997436	22.4056	9.46284	2.5082	0.129032	24.4	2940	7.4	4	Touat and Gourara
Adr 03	7.865	6.09375	19.0304	0.892308	18.9972	10.0833	2.09836	0.593548	26.4	2960	7.2	4	Touat and Gourara
Adr 04	5.92	5.71546	13.8739	0.751282	14.8085	8.23027	2.34426	0.404839	30.6	2330	7.1	4	Touat and Gourara
Adr 05	6.81	6.13487	12.113	0.692308	13.5324	8.86946	2.47541	0.703226	28	2240	7.2	4	Touat and Gourara
Adr 06	7.525	5.81414	11.7304	0.651282	11.5972	9.45243	2.5082	0.858065	26.7	2120	7.2	4	Touat and Gourara
Adr 07	6.025	4.8273	10.913	0.494872	9.20563	8.47387	2.96721	0.780645	20.1	1902	8.1	4	Touat and Gourara
Adr 08	6.26	6.01151	11.2783	0.597436	11.8056	8.47387	2.62295	0.546774	26.6	2070	7.4	4	Touat and Gourara
Adr 09	7.29	6.25	11.613	0.584615	11.9437	9.22548	3.13115	0.753226	27.4	2160	7.3	4	Touat and Gourara
Adr 10	6.015	4.62993	17.5043	0.915385	17.6366	7.92421	2.34426	0.164516	26.5	2520	7.3	4	Touat and Gourara
Adr 11	8.225	6.57895	14.0652	0.612821	14.6676	10.7391	1.96721	0.906452	25.8	2600	7.6	4	Touat and Gourara
Adr 12	42.115	49.0132	99.1304	2.26923	123.352	48.1574	1.40984	4.82097	22.3	15270	7.5	4	Touat and Gourara
Adr 13	9.37	6.79276	14.6304	0.579487	15.6113	11.801	2.03279	1.20323	26.5	2850	7.3	4	Touat and Gourara
Adr 14	10.275	7.17928	20.3391	1.14359	21.5324	12.2132	1.57377	1.45645	24.5	3420	7.8	4	Touat and Gourara
Adr 15	7.555	5.56743	21.3	1.07436	20.2845	10.1312	1.85246	0.896774	22.8	3140	7.6	4	Touat and Gourara
Adr 16	4.69	3.40461	9.23043	0.507692	7.56901	6.73537	1.91803	0.506452	24.6	1522	7.6	4	Touat and Gourara
Adr 17	3.005	2.1875	6.08261	0.310256	4.99437	3.44368	2.60656	0.358065	25.6	1080	7.5	4	Touat and Gourara
Adr 18	3.385	2.35197	7.33043	0.397436	6.42535	4.02249	3.36066	0.404839	26.8	1241	7.5	4	Touat and Gourara
Adr 19	3.515	3.08388	13.613	0.861538	9.58028	8.08453	2.63934	0.427419	24.8	2660	7.7	4	Touat and Gourara
Adr 20	5.6	4.22697	9.31304	0.712821	9.30986	7.208	2.08197	0.622581	26.4	1984	7.6	4	Touat and Gourara
Aou 01	5.98	5.15625	12.0522	0.682051	12.6563	8.65917	1.78689	0.319355	27.8	2140	7.5	4	Tidikelt
Aou 02	9.56	7.12171	19.9043	0.823077	22.1268	10.4122	2.01639	0.366129	26.5	3260	7.3	4	Tidikelt
Aou 03	5.905	4.02961	9.13478	0.64359	10.6958	6.22736	1.91803	0.18871	28.8	1758	7.4	4	Tidikelt
Aou 04	6.165	4.0625	9.64783	0.717949	12.8366	5.28212	3.47541	0.103226	29	1940	7.5	4	Tidikelt
Aou 05	7.055	5.35362	17.0087	0.738462	16.9606	10.4789	2.04918	0.204839	28.7	2590	7.6	4	Tidikelt	Aoulef
lnb 01	2.93	1.91612	2.65217	0.246154	2.19718	2.63793	2.34426	0.179032		722	7.6	4	S. M'zab dorsal & Tademaït	Tadmait
Reg 01	5.97	6.47204	15.6217	0.676923	13.7577	9.88549	3.45902	0.78871	25.3	2550	7.5	4	Touat and Gourara	Reggane
Reg 02	20.255	12.9934	33.8957	1.12821	34.9296	28.9007	1.83607	2.57581	27.1	5620	7.4	4	Touat and Gourara
Reg 03	12.16	8.63487	20.7913	0.820513	20.5662	15.5528	2.5082	1.7129	29.7	3590	7.3	4	Touat and Gourara
FX1	6.125	8.73355	10.2174	0.264103	12.3944	11.5136	3.65	0.191935	41.7	2240	7.12	This study	Transition
FX2	6.815	11.472	10.4348	0.264103	13.0423	12.4089	2.5	0.166129	40	2430	7.47	This study	Transition	This study
FX3	5.875	12.4178	10.0565	0.24359	13.7465	10.6392	2.75	0.170968	40.3	2030	7.33	This study	Transition
NK1	6.125	10.9457	9.02174	0.264103	11.8873	12.3256	2.55	0.196129	40.1	2210	7.46	This study	Transition
SM5	5.875	9.89309	8.64348	0.282051	10.6197	10.7433	2.75	0.174194	39.9	2230	7.24	This study	Transition
CVZGuerrara	6.5	10.7401	9.61739	0.397436	12.7042	11.6386	2.85	0.130484	40	2230	6.85	This study	Transition
GTF	7.19	13.2648	12.0652	0.558974	14	16.3648	2.65	0.0629032	41.8	2600	7.73	This study	Transition
FS	6.625	11.0526	10.1652	0.397436	13.1268	12.5963	2.6	0.145161	40.1	2320	6.89	This study	Transition
DR	6.625	13.6842	10.3261	0.397436	13.5493	15.178	2.67213	0.112903	42.1	2320	6.63	This study	Transition
KN	6.875	11.7188	9.62174	0.474359	14.338	12.4297	2.9	0.13871	45	2620	7.36	This study	Transition
Bouheraroua	9	6.38158	10.5217	0.230769	10.6761	12.0758	2.2459	0.0919355	29.1	2460	7.23	3	Transition	Ghardaia
Bensmara 1	8.15	6.19243	8.6087	0.25641	9.40845	10.0562	2.54098	0.0854839	30	2250	7.14	3	Transition
Daia Ben Dahoua	8	5.75658	9.95652	0.210256	9.01408	12.3465	2.27869	0.122581	31.6	2350	7.41	3	Transition
Hassi-Dalaa	8.05	5.55099	8	0.428205	8.95775	9.43161	2.86885	0.0258065	29.4	2130	7.27	3	Transition	Laghouat
Berriane 2	4.86	3.40461	5.95652	0.320513	5.32394	6.12117	3.01639	0.0354839	28.6	1500	7.56	3	Transition	Ghardaia
Guerrara:Laameyed	8.2	5.65789	10.087	0.489744	11.5775	9.91047	2.72131	0.0483871	37.4	2500	7.44	3	Transition
Laroui	6.65	4.97533	6.73913	0.453846	7.21127	7.995	3.2459	0.0290323	28.6	1860	7.44	3	Transition
Br01	5.6895	3.48766	6.26435	0.222821	5.86028	6.83448	3.36311	0.235806	30.5	1561.2	7.6	1	Transition	berriane
Br02	5.2985	3.63734	6.20826	0.193846	5.66648	6.54403	3.01902	0.233226	30.3	1489.4	7.8	1	Transition
Br03	7.0325	5.05921	6.86652	0.303077	7.34169	8.27212	3.56443	0.123226	31.2	1821.9	7.6	1	Transition
Bn01	7.715	4.77467	12.3665	0.119487	11.7	10.4118	2.28574	0.313871	32.3	2402.3	7.7	1	Transition
Bn02	7.379	4.89556	10.9191	0.138718	9.92085	10.3681	2.58393	0.366452	31.6	2227.6	7.7	1	Transition
Dy01	5.941	4.57812	8.10478	0.0551282	6.12479	9.66417	2.56213	0.444516	30.6	1769.1	7.8	1	Transition
Dy02	8.822	5.60609	12.3257	0.0989744	10.1259	13.9536	2.24984	0.544194	32.1	2465.9	7.6	1	Transition
Gd01	7.3795	4.85855	10.6717	0.0707692	8.5707	11.6092	2.30721	0.493065	31.6	2142	7.7	1	Transition
Gd02	7.9365	6.02056	10.0422	0.122051	10.5927	11.1124	2.30885	0.33129	30	2275.3	7.6	1	Transition	Ghardaia
Gd03	9.4415	5.59211	14.7957	0.109744	13.4662	13.5773	2.16738	0.495968	32	2811.4	7.7	1	Transition
Gd04	8.1515	5.16941	10.5591	0.0953846	9.92169	11.3288	2.38607	0.466935	30.2	2264.7	7.7	1	Transition
Gd05	8.0465	5.59457	10.3417	0.139487	11.1631	10.0989	2.54705	0.305484	32	2312.9	7.6	1	Transition
Gd06	8.2255	4.91776	12.5778	0.115897	10.5152	12.5511	2.44541	0.402097	29.5	2440	7.7	1	Transition
Tf01	8.604	6.21628	10.1083	0.136154	11.4572	11.0433	2.40426	0.362258	31	2379.5	7.8	1	Transition
Mt00	10.589	5.31826	18.0122	0.249744	16.2144	16.1099	2.42934	0.651129		3201.7	7.6	1	Transition
Mt01	5.7085	3.85197	8.54174	0.130256	7.72563	7.45055	2.78393	0.321935	32.7	1782.1	7.7	1	Transition	Metlili
Mt02	9.4585	5.62171	9.76174	0.111795	11.8732	10.6921	1.88754	0.30129	33.3	2357.8	7.8	1	Transition
Mt03	6.1545	4.20312	6.91217	0.0851282	6.71493	8.25734	2.10656	0.29	31.4	1665.2	7.7	1	Transition
Mt04	5.559	3.82812	6.3913	0.0746154	5.88648	7.61795	2.08393	0.31	32.2	1541.5	7.8	1	Transition
Mt05	4.845	3.74753	6.60087	0.150256	4.75634	7.6142	2.86049	0.289194	32.7	1469.4	7.8	1	Transition
Gr01	8.1355	5.67845	11.2743	0.404359	10.8746	11.5707	3.00557	0.0435484	43.8	2390	7.6	1	Transition	Guerrara
Gr02	8.606	5.88898	11.1522	0.330513	12.8944	10.2528	2.62787	0.25371	38.6	2473	7.6	1	Transition
Gr03	9.1565	6.48026	10.7591	0.421538	13.7479	10.3483	2.60377	0.186613	41.2	2540.7	7.7	1	Transition
Zf01	7.393	5.08964	11.6213	0.218718	11.6732	9.80408	2.56328	0.331613	39.2	2342.1	7.8	1	Transition	Zelfana
Zf02	6.3155	4.42845	8.64565	0.251795	8.3538	8.25567	2.82082	0.32	39.5	1899.3	7.8	1	Transition
Zf03	6.309	4.42352	8.56609	0.238205	8.26535	8.22548	2.82033	0.324516	38.7	1897.9	7.8	1	Transition
Zf04	6.353	4.35033	9.66522	0.192821	9.01915	8.48782	2.76033	0.347903	38	1997.7	7.8	1	Transition
Mr01	4.212	2.2097	5.45652	0.0769231	4.06704	5.38518	2.04066	0.352742	30	1184.7	7.9	1	Transition	Mansoura
Mr02	4.486	3.00411	7.36	0.167179	4.49944	7.35103	2.8723	0.344677	30.2	1460.6	7.9	1	Transition
Mr03	4.645	3.17845	7.44174	0.185128	4.53662	7.65959	2.89836	0.350161	29.8	1480	7.8	1	Transition
Sb01	7.347	4.07812	7.80391	0.0507692	7.27972	9.48886	1.84803	0.462097	30.4	1822.8	7.7	1	Transition	Sebseb
Sb02	6.792	3.97944	7.7887	0.0582051	6.32648	9.98605	1.96443	0.440161	29.8	1760.9	7.8	1	Transition
Sb03	6.074	3.65954	7.68739	0.0617949	6.32873	8.88403	1.94066	0.408226	29.9	1680.2	7.9	1	Transition
Sb04	7.1365	5.4375	7.80957	0.203846	6.92423	10.9367	2.68082	0.365484	33.1	1921.5	7.8	1	Transition
Hf01	2.875	1.47615	5.0187	0.114615	2.76563	4.24152	2.04525	0.352419	33.2	949.6	7.8	1	Transition	Hassi fehal
Hf02	3.8975	2.13405	3.17696	0.15641	3.82141	3.74537	1.37197	0.397581	32	953.6	7.7	1	Transition
LAG 21	5.72	4.72039	9.03913	0.235897	8.30704	7.93879	2.62295	0.159677	33.9	2220	7.4	4	Transition	Hassi Delaa
LAG 22	6.005	5.64967	7.58261	0.217949	7.2338	8.70914	2.70492	0.13871	33.9	2070	7.3	4	Transition
GHA 02	5.32	4.81086	5.14348	0.217949	6.52676	6.95815	2.81967	0.437097	32.2	1673	7.2	4	Transition	berriane
GHA 03	3.935	3.51151	4.96522	0.297436	4.94366	5.54862	2.13115	0.474194	32.5	1363	7.5	4	Transition
GHA 04	4.195	3.93092	4.65652	0.184615	5.20563	5.9442	2.45902	0.572581	32	1447	7.4	4	Transition
GHA 01	6.475	7.00658	6.3913	0.166667	9.67042	9.50864	1.95082	0.622581	32.3	2040	7.3	4	Transition	Ghardaia
2	5.2	8.42928	11.3043	0.512821	11.2676	12.4922	2	0.232258	58.7	3160	7.22	5	Oriental basin
7	6	7.8125	13.913	0.641026	12.6761	13.7414	1.95082	0.0369839	57.4	3160	7.17	5	Oriental basin	Oued righ
9	5.2	6.99013	13.1087	0.641026	12.6761	12.4922	1.75082	0.0529355	56.3	2910	7.08	5	Oriental basin
11	7	5.1398	12.6087	0.692308	11.2676	12.4922	1.75082	0.209839	58	2890	6.91	5	Oriental basin
12	4	5.1398	11.3043	0.717949	9.01408	9.36914	2.5	0.415323	58.8	3310	7.19	5	Oriental basin
16	6	12.0066	9.43478	0.897436	12.9014	15.1988	2.7541	0	58	2230	7.4	5	Oriental basin
18	5	7.19572	10	0.512821	9.85915	10.4102	2.25082	0.349032	54	2720	7.17	5	Oriental basin
19	5.6	7.19572	10.8696	0.641026	10.7042	10.8266	2.25082	0.305806	58	2660	6.9	5	Oriental basin
22	5.6	6.57895	11.3043	0.764103	11.2676	12.0758	2.2	0.203065	63.5	2700	7.14	5	Oriental basin
23	5	5.96217	9.56522	0.707692	9.57746	9.88965	1.9	0.044129	65.1	2300	6.96	5	Oriental basin
24	4	5.34539	10.8696	0.671795	9.29577	9.57735	2.25082	0	52.5	2630	7.53	5	Oriental basin
26	6.2	6.99013	11.7391	0.530769	11.2676	11.6594	1.9	0.00333871	53	2860	7.03	5	Oriental basin	Ouargla
14	5.6	6.57895	11.3043	0.523077	10.7042	11.0348	3.25082	0.0212258	51	2230	7.4	5	Oriental basin
G2	6	12.8289	10.4348	0.769231	12.2535	14.4909	1.9	0	56.3	1900	8.31	5	Oriental basin
Kh1	9	9.86842	10.4348	1.28205	18.3099	14.0537	2.2	0	47.8	3830	7.12	5	Oriental basin
M3	8.75	7.89474	10	0.884615	10.4225	14.9698	2.25082	0	55.7	2840	8.35	5	Oriental basin
Tg01	11.977	7.25576	11.85	0.844103	14.6439	14.5536	2.62	0.00483871	55.6	2985.2	7.8	1	Oriental basin	Touggourt
Og01	9.1745	5.75493	18.4352	0.596667	18.2285	12.7327	2.85656	0.00258065	53.2	3297.8	7.9	1	Oriental basin	Ouargla
Og02	8.645	5.80921	11.2791	0.632564	12.1625	11.1262	2.81803	0.0627419	47.5	2531.2	7.8	1	Oriental basin	Ouargla
El-Mir	9.45	5.44408	8.86957	0.730769	11.1268	15.0323	2.47541	0.00483871	50.8	2850	7.6	3	Oriental basin	Ouargla
Blidet Omar 1989	10.5	6.02796	8.91304	0.879487	12.6197	13.7831	2.7377	0.00483871	46.5	2750	7.61	3	Oriental basin	Oued
Ain-Sahara	10.75	6.48026	10.4348	0.871795	14.3662	15.0947	2.5082	0.00483871	50.5	3000	7.51	3	Oriental basin
Sidi-Slimane 1	11.35	7.59046	11.6522	1.09487	14.1408	13.8039	2.70492	0.00483871	51.7	2940	7.57	3	Oriental basin	Righ
Sidi-Slimane 2	10.7	7.77138	11.4348	1.01282	13.7465	13.8663	2.85246	0.00483871	54.7	2910	7.38	3	Oriental basin
Meggarine	13.5	8.19901	13.6957	1.00769	17.662	15.9067	2.52459	0.00483871	53.7	3460	7.39	3	Oriental basin
Ain-Choucha	9.55	7.00658	9.65217	0.961538	11.8028	12.055	2.85246	0.00483871	46.5	2630	7.82	3	Oriental basin
Etteibat	14	8.63487	15.0435	1.2	15.7746	14.0329	2.27869	0.00483871	55.2	3210	7.62	3	Oriental basin
Sehane El Berry	9.25	3.07566	27.3478	0.935897	12.338	20.8203	1.77049	0.00483871	35.9	3490	7.8	3	Oriental basin	El Oued
El Oued	13.75	6.43914	12.7826	1.28205	13.5211	14.5742	2.4918	0.00483871	55.7	2960	6.93	3	Oriental basin
Sidi-Mahdi	12.3	7.50822	12.2174	1.0359	12.6761	14.0954	2.5082	0.00483871	37.9	2820	7.49	3	Oriental basin	Oued righ
Khchem Er'rih	9.05	6.3898	12	0.820513	12.338	11.5345	2.83607	0.00322581	48.5	2650	7.58	3	Oriental basin
Hassi Ben Abdelleh 3	9.4	6.30757	11.7826	0.820513	12.2535	10.7641	2.7541	0.00483871	49.6	2700	7.82	3	Oriental basin	Ouargla
Hassi Ben Abdelleh 4	8.05	5.71546	11.1739	0.761538	12.1127	9.63981	2.83607	0.00483871	48.9	2630	7.6	3	Oriental basin
Zelfana 1	8.15	5.22204	13.6957	0.294872	13.5775	8.95274	2.4918	0.0709677	37.8	2800	7.59	3	Oriental basin	Ghardaia
Zelfana 8 (Fedj Enaam)	6.65	4.5148	10.9565	0.276923	10.1408	8.84864	2.72131	0.0758065	34	2290	7.72	3	Oriental basin
M'RARA MR3	10.45	7.03125	9.47826	0.982051	10.9859	11.8676	1.65574	0.00016129	47.5	2720	7.2	3	Oriental basin	Oued
M'RARA MR4	11.45	7.03125	8.69565	1.03333	10.9859	12.4922	1.80328	0.00016129	48	2730	7.29	3	Oriental basin	Righ
NEFTA CI 1	20.6	5.46875	23	1.79231	16.9014	31.4387	2.3	0.00483871	70	5130	7.34	3	Oriental basin
NEFTA CI 2	18.55	3.56908	16.2609	1.61282	9.01408	28.732	2.36	0.00483871	72	4700	7.17	3	Oriental basin
TOZEUR CI 1	44.45	22.9441	152.174	2.04615	167.887	38.3094	1.7	0.00483871	67	24400	7.16	3	Oriental basin
TOZEUR CI 2	17.35	3.18257	26.1304	1.24872	14.6479	33.7289	2.2	0.00483871	68	5880	7.33	3	Oriental basin
TOZEUR CI 3	19.5	3.80757	14.2174	1.53846	10.0282	27.4828	1.80328	0.00483871	66	4200	7.13	3	Oriental basin
EL-HAMMA C I2	15.2	2.45888	28.3478	1.18718	10.1408	35.6027	4.2	0.00483871	64	5030	8.2	3	Oriental basin
EL-HAMMA C I4	14.35	2.53289	22.3043	1.41026	19.6056	30.1895	2.2	0	73		7.57	3	Oriental basin	Tunisia
TAZRARIT CI 1	9.8	2.70559	40.2174	2.82051	45.0704	9.45243	0.54	0.00483871	68	5650	8.52	3	Oriental basin
CEDADA CI 2	17	3.10855	14.6087	2.31795	12.4507	21.4449	3.4	0.00483871	38		7.11	3	Oriental basin
CHORFA CI 4	13.3	6.08553	14.3478	1.21282	17.4648	14.3868	2.2	0.00483871	70	4440	7.18	3	Oriental basin
ZOUIA CI 5	14.2	6.48849	14.5652	1.23077	18.4789	14.9073	2.2	0.00483871	71	4360	7.24	3	Oriental basin
MANSOURA CI 3	20.4	7.22862	24.4348	0.987179	23.9437	26.2336	2	0.00483871	52	4940	7.57	3	Oriental basin
MANSOURA CI 13	12.85	5.56743	15	1.10256	16.9014	14.7408	2.3	0.00483871	65	3680	7.74	3	Oriental basin
KEBILI CI 10	13.15	5.52632	16.8261	1.08718	17.3521	16.3231	2.2	0.00483871	66	3930	7.55	3	Oriental basin
KEBILI CI 16	9.25	5.33717	17.2174	1.05897	17.1831	14.6367	2	0.00483871	70	3130	7.2	3	Oriental basin
TAOUARGHA CI 2	13.45	5.89638	14.8261	1.10769	17.4648	15.407	2.4	0.00483871	45.5	3130	7.2	3	Oriental basin
EL BHAIER CI 9	15.3	6.09375	15.7826	1.20256	19.0423	16.8228	2.1	0.00483871	65	3460	7.17	3	Oriental basin
LIMAGUES CI 8	14.25	5.80592	15.8696	1.12051	17.8592	16.4481	1.8	0.00483871	67	3340	7.3	3	Oriental basin
DEBABCHA CI 14	13.55	5.9375	13.3043	1.15128	16.6761	15.2821	2.1	0.00483871	71	4640	7.07	3	Oriental basin
SOUK EL AHAD CI 17	10.05	5.04112	12.2174	1.08462	13.0704	13.4291	1.8	0.00483871	68	2830	7.35	3	Oriental basin
MENCHIA CI 6	13.85	2.48355	21.2174	1.33333	19.7183	29.9813	0.7	0.00483871	72	3640	7.04	3	Oriental basin
SEFTIMI	13.55	6.46382	14.8261	1.21282	18.3662	14.7824	2.3	0.00483871	72.5	3250	7.54	3	Oriental basin
Tid1	9.215	5.64967	19.7348	0.884615	22.1718	10.1333	2.01639	0.243548	29.7	3380	7.34	6	Tidikelt
Tid2	9.445	5.78125	19.6348	0.892308	21.9014	10.6121	1.93443	0.308065	31.2	3400	6.9	6	Tidikelt
Tid3	9.27	5.63322	18.6478	0.884615	20.1606	10.7204	2.5082	0.340323	30.9	3060	6.83	6	Tidikelt
Tid4	9.275	5.56743	19.6565	0.851282	20.7803	11.2097	1.93443	0.370968	31.2	3140	6.88	6	Tidikelt
Tid5	4.71	3.02632	9.34348	0.687179	10.3521	4.66375	2.37705	0.133871	28.6	1070	7.1	6	Tidikelt
Tid6	5.4	3.53618	12.6913	0.823077	14.107	5.9671	2.08197	0.127419	25.7	2070	7.1	6	Tidikelt
Tid7	8.8	9.76151	28.1522	1.05128	36.4704	13.7123	2.32787	0	23	6780	7.33	6	Tidikelt
Tid8	4.74	4.89309	10.7609	0.679487	11.3662	8.96523	2.39344	0	25.2	3170	7.58	6	Tidikelt
Tid9	9.96	7.0477	25.687	1.15641	30.9155	10.1957	2.18033	0.1	26	4060	7.79	6	Tidikelt
Tid27	8.12	5.09868	18.6087	0.812821	17.3239	10.5476	1.93443	0.395161	28.5	3010	6.93	6	Tidikelt	Tidikelt
Tid10	6.35	4.40789	12.0739	0.425641	7.79437	10.7433	2.29508	0.575806	24.5	2230	7.01	6	Tidikelt
Tid11	6.855	4.59704	12.313	0.446154	7.98873	11.7885	2.32787	0.808065	28.4	2260	7.07	6	Tidikelt
Tid12	8.53	4.91776	12.013	0.461538	8.22254	12.6171	2.34426	0.832258	28.8	2410	7.27	6	Tidikelt
Tid13	9.27	5.50987	11.8609	0.528205	6.29859	13.2334	1.68852	0.908065	29.8	2340	7.13	6	Tidikelt
Tid14	6.855	4.40789	12.3478	0.430769	8.10141	11.143	2.70492	0.577419	25.8	2160	7.3	6	Tidikelt
Tid15	6.695	4.78618	12.9217	0.402564	9.92958	10.1187	2.09836	0.525806	27.6	2290	7.23	6	Tidikelt
Tid16	9.33	5.36184	15.2652	0.905128	12.7662	12.9648	1.91803	0.708065	28.6	3050	6.99	6	Tidikelt
Tid17	11.835	6.53783	18.7217	1.02051	18.8648	14.2702	1.93443	0.527419	29.3	3280	7.05	6	Tidikelt
Tid18	10.12	6.48026	18.3217	0.997436	18.9014	12.0196	2.03279	0.174194	30.5	3290	7.22	6	Tidikelt
Tid19	9.92	7.75493	17.0609	0.730769	18.769	14.0704	2.68852	0	29.8	4860	6.92	6	Tidikelt
Tid20	10.53	7.45066	16.4	0.789744	16.0592	16.5896	2.42623	0	29.8	4760	6.76	6	Tidikelt
Tid21	11.465	6.46382	19.3261	1.11538	23.0704	11.116	2.13115	0.169355	29.5	3410	6.89	6	Tidikelt
Tid22	12.04	7.55757	18.3783	0.789744	22.7296	13.0523	2.93443	0	28.8	5340	7.16	6	Tidikelt
Tid24	11.145	6.52961	21.2174	1.27692	25.1606	14.4826	2.70492	0	29.2	3820	6.79	6	Tidikelt
Tid25	11.14	4.60526	20.3522	1.27692	21.4761	14.4618	2.85246	0	29.7	3490	6.54	6	Tidikelt
Tid26	10.73	6.49671	20.3522	1.27692	19.6394	15.6132	2.42623	0	27.5	3430	6.87	6	Tidikelt
Tid28	13.14	9.67105	27.2	1.36923	38.9296	8.84864	2.70492	0	29.6	4650	7.15	6	Tidikelt
Tid29	11.42	7.14638	21.2348	1.21538	26.031	11.7073	2.09836	0.193548	27.6	3800	7.21	6	Tidikelt
Tid30	10.665	6.38158	19.6609	1.03077	24.2113	10.2394	2.13115	0.151613	26.8	3440	7.22	6	Tidikelt

## Sheet: Page 3
Table S8. Water molecule stable isotopes (δ2H and δ18O) ratios for the CI aquifer (units are in ‰). a. Hakimi et al (2021). b. Darling et al (2018). c. Edmunds et al. (2003). d. Moulla et al. (2012). e. Abdelali et al. (2020). f. Petersen et al. (2018). g. Cherchali et al. (2021).
	References
a	Hakimi, Y., Orban, P., Deschamps, P., Brouyere, S., 2021. Hydrochemical and isotopic characteristics of groundwater in the Continental Intercalaire aquifer system: Insights from Mzab Ridge and surrounding regions, North of the Algerian Sahara. Journal of Hydrology: Regional Studies 34, 100791. https://doi.org/10.1016/j.ejrh.2021.100791
b	Darling, W.G., Sorensen, J.P.R., Newell, A.J., Midgley, J., Benhamza, M., 2018. The age and origin of groundwater in the Great Western Erg sub-basin of the North-Western Sahara aquifer system: Insights from Krechba, central Algeria. Applied Geochemistry 96, 277–286. https://doi.org/10.1016/j.apgeochem.2018.07.016
c	Edmunds, W.M., Guendouz, A.H., Mamou, A., Moulla, A., Shand, P., Zouari, K., 2003. Groundwater evolution in the Continental Intercalaire aquifer of southern Algeria and Tunisia: trace element and isotopic indicators. Applied Geochemistry 18, 805–822. https://doi.org/10.1016/S0883-2927(02)00189-0
d	Moulla, A.S., Guendouz, A., Cherchali, M.E.-H., Chaid, Z., Ouarezki, S., 2012. Updated geochemical and isotopic data from the Continental Intercalaire aquifer in the Great Occidental Erg sub-basin (south-western Algeria). Quaternary International 257, 64–73. https://doi.org/10.1016/j.quaint.2011.08.038
e	Abdelali, A., Nezli, I.E., Kechiched, R., Attalah, S., Benhamida, S.A., Pang, Z., 2020. Geothermometry and geochemistry of groundwater in the Continental Intercalaire aquifer, southeastern Algeria: Insights from cations, silica and SO4–H2O isotope geothermometers. Applied Geochemistry 113, 104492. https://doi.org/10.1016/j.apgeochem.2019.104492
f	Petersen, J.O., Deschamps, P., Hamelin, B., Fourré, E., Gonçalvès, J., Zouari, K., Guendouz, A., Michelot, J.-L., Massault, M., Dapoigny, A., Team, A., 2018. Groundwater flowpaths and residence times inferred by 14C, 36Cl and 4He isotopes in the Continental Intercalaire aquifer (North-Western Africa). Journal of Hydrology. 560, 11–23. https://doi.org/10.1016/j.jhydrol.2018.03.003
g	Cherchali, M.E.-H., Moulla, A.S., Amrous, K., Ouarezki, S.-A., Rezka, A., Daas, N., 2021. The Continental Intercalaire groundwaters of the Tidikelt (In-Salah region, Algeria). Hydrochemical and isotopic features. Isotopes in Environmental and Health Studies 57, 217–235. https://doi.org/10.1080/10256016.2021.1875221
Sample	δ2H	δ18O	Location	Area covered	Reference
Gl01			El Golea	Tademaît recharge	a
Gl02				Tademaît recharge	a
Gl03				Tademaît recharge	a
Gl04				Tademaît recharge	a
Gl05				Tademaît recharge	a
Gl06				Tademaît recharge	a
Gl07				Tademaît recharge	a
Gl08				Tademaît recharge	a
Gl09				Tademaît recharge	a
Gl10				Tademaît recharge	a
Gl11	-56.5	-6.9		Tademaît recharge	a
Gl12	-54.7	-6.6		Tademaît recharge	a
Gl13	-58.7	-7.4		Tademaît recharge	a
Gl14	-61.5	-7.9		Tademaît recharge	a
Hg01	-47.2	-4.7	Hassi Gara	Tademaît recharge	a
Hg02	-47.8	-4.8		Tademaît recharge	a
Hg03	-48	-4.8		Tademaît recharge	a
Hg04	-48.5	-5.2		Tademaît recharge	a
Hg05				Tademaît recharge	a
kb602	-51	-5.1	Krechba	Tademaît recharge	b
kb603	-48.4	-4.8		Tademaît recharge	b
kb604	-50.3	-5.3		Tademaît recharge	b
kb605	-50.5	-5.4		Tademaît recharge	b
kb606	-50.4	-5		Tademaît recharge	b
El-Assafia 1	-53	-7.7	Atlas mt	Atlas mt	c
Djebel Makrane (U1)	-40	-6.3	Recharge	Atlas mt	c
LAG 01	-50.7	-5.7		Atlas mt	d
LAG 02	-61.7	-8.5		Atlas mt	d
LAG 03	-56.1	-7.2	Atlas mt	Atlas mt	d
LAG 04	-43.2	-6.2	recharge	Atlas mt	d
LAG 05	-54.2	-6.9		Atlas mt	d
LAG 06	-54.8	-7.2		Atlas mt	d
LAG 07	-56.7	-7.2		Atlas mt	d
LAG 08	-51.2	-6.9		Atlas mt	d
LAG 09	-54.2	-7.4	Laghouat	Atlas mt	d
LAG 10	-48.5	-6.5		Atlas mt	d
LAG 11	-49.3	-7		Atlas mt	d
LAG 12	-39.5	-4.5		Atlas mt	d
LAG 13	-45.7	-6		Atlas mt	d
LAG 14	-53.7	-7.5		Atlas mt	d
LAG 15	-41.4	-6.1		Atlas mt	d
LAG 16	-40	-6		Atlas mt	d
LAG 17	-52.1	-6.7		Atlas mt	d
LAG 18	-44	-5.5		Atlas mt	d
LAG 19	-57.5	-7.6	Hassi R'mel	Transition	d
LAG 20	-34.8	-4.7		Transition	d
LAG 23	-56.5	-7.9		Transition	d
LAG 24	-50.5	-7.8		Transition	d
Elm 01	-50	-4.7	El Golea	Tademaît recharge	d
Elm 02	-59.1	-7.1		Tademaît recharge	d
KS 1	-52	-4.7	Saoura	Saoura	d
Tim 01	-54.7	-5.6		Touat and Gourara	d
Tim 02	-50.6	-3.7		Touat and Gourara	d
Tim 03	-50.5	-3.7		Touat and Gourara	d
Tim 04	-55.6	-5		Touat and Gourara	d
Tim 05	-64.1	-7.1		Touat and Gourara	d
Tim 06	-48.3	-4.6		Touat and Gourara	d
Tim 07	-55	-5.2		Touat and Gourara	d
Tim 08	-55	-5.2		Touat and Gourara	d
Tim 09	-50.4	-4.2		Touat and Gourara	d
Tim 10	-44.9	-3.6		Touat and Gourara	d
Tim 11	-50.8	-4	Timimoun	Touat and Gourara	d
Tim 12	-58.2	-6.1		Touat and Gourara	d
Tim 13	-54.3	-4.6		Touat and Gourara	d
Tim 14	-49.6	-3.2		Touat and Gourara	d
Tim 15	-50.7	-4.6		Touat and Gourara	d
Tim 16	-41.4	-2.5		Touat and Gourara	d
Tim 17	-53.6	-5.8		Touat and Gourara	d
Tim 18	-48.2	-4.1		Touat and Gourara	d
Tim 19	-50.1	-4.5		Touat and Gourara	d
Tim 20	-54.8	-5.5		Touat and Gourara	d
Tim 21	-58.9	-6.3		Touat and Gourara	d
Adr 01	-51.9	-4	Adrar	Touat and Gourara	d
Adr 02	-57.7	-6.4		Touat and Gourara	d
Adr 03	-57.6	-7		Touat and Gourara	d
Adr 04	-56.6	-6.7		Touat and Gourara	d
Adr 05	-58.7	-7.1		Touat and Gourara	d
Adr 06	-61.8	-7.1		Touat and Gourara	d
Adr 07	-63.4	-7.9		Touat and Gourara	d
Adr 08	-62	-7.2		Touat and Gourara	d
Adr 09	-64.4	-8		Touat and Gourara	d
Adr 10	-64.5	-7.2		Touat and Gourara	d
Adr 11	-59.9	-7.8		Touat and Gourara	d
Adr 12	-50.5	-5.2		Touat and Gourara	d
Adr 13	-58.1	-7.8		Touat and Gourara	d
Adr 14	-52.3	-6.9		Touat and Gourara	d
Adr 15	-51.1	-6.9		Touat and Gourara	d
Adr 16	-54.3	-5.1		Touat and Gourara	d
Adr 17	-58.2	-4.5		Touat and Gourara	d
Adr 18	-59.5	-6.5		Touat and Gourara	d
Adr 19	-50.5	-6.7		Touat and Gourara	d
Adr 20	-57.4	-5.2		Touat and Gourara	d
Aou 01	-60.3	-6.3		Tidikelt	d
Aou 02	-57.2	-7.4		Tidikelt	d
Aou 03	-58.2	-7.2		Tidikelt	d
Aou 04	-58.6	-7.4		Tidikelt	d
Aou 05	-55.9	-6.5	Aoulef	Tidikelt	d
lnb 01	-58.5	-6.8	Tadmait	Tademaît recharge	d
Reg 01	-65.2	-6.3	Reggane	Touat and Gourara	d
Reg 02	-61.1	-7.8		Touat and Gourara	d
Reg 03	-49.1	-6.6		Touat and Gourara	d
A1	-48.3	-4.7		Saoura	d
AN 1	-43.2	-4.3	Saoura	Saoura	d
B1	-45.5	-3.3		Saoura	d
F'10	-45.5	-4.6		Saoura	d
IG3	-42.1	-4.1		Saoura	d
IG5	-43.3	-4.4		Saoura	d
KH1	-43	-2.6		Saoura	d
KH10	-49.7	-4.9		Saoura	d
KH12	-46.1	-4		Saoura	d
KH3	-49.6	-4.2		Saoura	d
KH4	-43.5	-3.7		Saoura	d
KH7	-48.6	-4.5		Saoura	d
KH9	-46.6	-4.3		Saoura	d
Krz 01	-49.6	-4.9		Saoura	d
Krz02	-51.1	-5.3		Saoura	d
M1	-50.7	-5.8		Saoura	d
MZ2	-49.4	-5.2		Saoura	d
MZ3	-47.9	-4.6		Saoura	d
MZS4	-45.4	-4.1		Saoura	d
R1	-45.8	-4.6		Saoura	d
RF1	-48	-4.5		Saoura	d
s1	-41.4	-4.1		Saoura	d
s3	-45.3	-4.8		Saoura	d
SD	-35	-2.3		Saoura	d
SG4	-43	-4		Saoura	d
SG6	-43.3	-4		Saoura	d
TM1	-43.9	-3.7		Saoura	d
TZ3	-42.2	-4.1		Saoura	d
Z3	-67.2	-9.2		Saoura	d
Z6	-59.4	-7.5		Saoura	d
1	-41	-6.5		Oriental basin	d
3	-46	-6.8	Recharge in Dahar	Oriental basin	d
4	-48	-6.6	Tunisia	Oriental basin	d
12	-60	-7.7		Oriental basin	d
13	-52	-7.1		Oriental basin	d
FX1	-62.2	-8.31		Transition	This study
FX2	-62.6	-8.19	This study	Transition	This study
FX3	-62.6	-8.2		Transition	This study
NK1	-60.7	-7.86		Transition	This study
SM5	-62.9	-8.29		Transition	This study
CVZGuerrara	-62.2	-8.04		Transition	This study
GTF	-51.7	-5.67		Transition	This study
FS	-62.4	-8.07		Transition	This study
DR	-62.7	-8.26		Transition	This study
KN	-63.2	-8.54		Transition	This study
Bouheraroua	-68	-8.3	Ghardaia	Transition	c
Bensmara 1	-64	-8.6		Transition	c
Daia Ben Dahoua	-63	-8.5		Transition	c
Hassi-Dalaa	-58	-8.1	Laghouat	Transition	c
Berriane 2	-59	-8.1	Ghardaia	Transition	c
Guerrara:Laameyed	-60	-8.3		Transition	c
Laroui	-61	-8.4		Transition	c
Br01	-60.7	-8	berriane	Transition	a
Br02	-61.7	-8.2		Transition	a
Br03				Transition	a
Bn01				Transition	a
Bn02				Transition	a
Dy01	-63.9	-8.8		Transition	a
Dy02				Transition	a
Gd01				Transition	a
Gd02			Ghardaia	Transition	a
Gd03	-62.5	-8.4		Transition	a
Gd04				Transition	a
Gd05				Transition	a
Gd06				Transition	a
Tf01				Transition	a
Mt00				Transition	a
Mt01			Metlili	Transition	a
Mt02				Transition	a
Mt03				Transition	a
Mt04	-59.1	-7.8		Transition	a
Mt05				Transition	a
Gr01			Guerrara	Transition	a
Gr02	-61.4	-8.2		Transition	a
Gr03				Transition	a
Zf01			Zelfana	Transition	a
Zf02	-63.2	-8.8		Transition	a
Zf03				Transition	a
Zf04	-58	-7.9		Transition	a
Mr01	-57.3	-7.4	Mansoura	Transition	a
Mr02				Transition	a
Mr03	-59.4	-8.2		Transition	a
LAG 21	-60.4	-7.9	Hassi Delaa	Transition	d
LAG 22	-57.5	-6.8		Transition	d
GHA 02	-56	-6.4	berriane	Transition	d
GHA 03	-60	-7.8		Transition	d
GHA 04	-58.7	-6.8		Transition	d
GHA 01	-61.6	-7.9	Ghardaia	Transition	d
2	-60.361	-8.19498		Oriental basin	e
7	-60.7563	-8.24693	Oued righ	Oriental basin	e
9	-60.0613	-8.14203		Oriental basin	e
11	-59.8918	-8.3086		Oriental basin	e
12	-61.1334	-8.37941		Oriental basin	e
16	-59.3403	-8.25229		Oriental basin	e
18	-56.3544	-7.81333		Oriental basin	e
19	-54.3483	-7.52242		Oriental basin	e
22	-55.0618	-7.61915		Oriental basin	e
23	-63.3642	-8.83531		Oriental basin	e
24	-64.3946	-8.72658		Oriental basin	e
26	-64.1546	-8.76318	Ouargla	Oriental basin	e
14	-61.8559	-8.42563		Oriental basin	e
G2	-58.3181	-7.91842		Oriental basin	e
Kh1	-63.1907	-8.54609		Oriental basin	e
M3	-58.1958	-7.98104		Oriental basin	e
Tg01	-57.1	-7.8	Oued Righ	Oriental basin	a
Og01	-63.4	-8.5	Ouargla	Oriental basin	a
Og02			Ouargla	Oriental basin	a
El-Mir	-58	-7.8	Ouargla	Oriental basin	c
Blidet Omar 1989	-62	-8.2	Oued	Oriental basin	c
Ain-Sahara	-60	-8		Oriental basin	c
Sidi-Slimane 1	-59	-8.5	Righ	Oriental basin	c
Sidi-Slimane 2	-61	-8.4		Oriental basin	c
Meggarine	-61	-8.3		Oriental basin	c
Ain-Choucha	-61	-8.4		Oriental basin	c
Etteibat	-61	-7.8		Oriental basin	c
Sehane El Berry	-60	-8	El Oued	Oriental basin	c
El Oued	-63	-8.1		Oriental basin	c
Sidi-Mahdi	-57	-7.7	Oued righ	Oriental basin	c
Khchem Er'rih	-61	-7.6		Oriental basin	c
Hassi Ben Abdelleh 3	-64	-9.1	Ouargla	Oriental basin	c
Hassi Ben Abdelleh 4	-63	-7.2		Oriental basin	c
Zelfana 1	-60	-7.9	Ghardaia	Oriental basin	c
Zelfana 8 (Fedj Enaam)	-63	-8.9		Oriental basin	c
M'RARA MR3	-61	-8.4	Oued	Oriental basin	c
M'RARA MR4	-59	-8.2	Righ	Oriental basin	c
NEFTA CI 1	-58	-7.1		Oriental basin	c
NEFTA CI 2	-50	-7.7		Oriental basin	c
TOZEUR CI 1	-57	-7		Oriental basin	c
TOZEUR CI 2	-62	-7.7		Oriental basin	c
TOZEUR CI 3	-61	-7.6		Oriental basin	c
EL-HAMMA C I2	-67	-6.8		Oriental basin	c
EL-HAMMA C I4	-57	-6.8	Tunisia	Oriental basin	c
TAZRARIT CI 1	-62	-7.5		Oriental basin	c
CEDADA CI 2	-53	-8		Oriental basin	c
CHORFA CI 4	-60	-8.8		Oriental basin	c
ZOUIA CI 5	-56.8	-7.61		Oriental basin	c
MANSOURA CI 3	-64	-8.3		Oriental basin	c
MANSOURA CI 13		-8.4		Oriental basin	c
KEBILI CI 10	-64	-8.4		Oriental basin	c
KEBILI CI 16		-8.3		Oriental basin	c
TAOUARGHA CI 2	-59	-8.6		Oriental basin	c
EL BHAIER CI 9	-59	-8.1		Oriental basin	c
LIMAGUES CI 8	-61	-8.5		Oriental basin	c
DEBABCHA CI 14	-58	-8.1		Oriental basin	c
SOUK EL AHAD CI 17	-59	-8.2		Oriental basin	c
MENCHIA CI 6	-60	-8.4		Oriental basin	c
SEFTIMI	-59	-8.4		Oriental basin	c
2	-57	-7.4		Oriental basin	f
5	-66	-8		Oriental basin	f
6	-66	-8.1	Djeffara	Oriental basin	f
7	-66	-8.1		Oriental basin	f
8	-65	-8.5		Oriental basin	f
9	-69	-9.1		Oriental basin	f
10	-66	-8.4		Oriental basin	f
11	-66	-8.2		Oriental basin	f
19	-56	-7.6		Oriental basin	f
20	-56	-7.6	Tozeur	Oriental basin	f
21	-55	-7.6		Oriental basin	f
22	-56	-7.4	Ridge	Oriental basin	f
23	-56	-7.7		Oriental basin	f
24	-56	-7.8		Oriental basin	f
25	-55	-6.9		Oriental basin	f
26	-52	-6.2		Oriental basin	f
27	-57	-7.6		Oriental basin	f
14	-60	-7.7		Oriental basin	f
15	-62	-8.3	Kebili	Oriental basin	f
16	-62	-8.4	Gabes	Oriental basin	f
18	-62	-8.1		Oriental basin	f
29	-61	-8.3		Oriental basin	f
32	-61	-8.3		Oriental basin	f
33	-62	-8.4		Oriental basin	f
Tid1	-60.6	-7.71		Tidikelt	g
Tid2	-62.2	-7.9		Tidikelt	g
Tid3	-62.7	-8.13		Tidikelt	g
Tid4	-66.1	-8.4		Tidikelt	g
Tid5	-61	-8.52		Tidikelt	g
Tid6		-7.51		Tidikelt	g
Tid7	-56.8	-7.04		Tidikelt	g
Tid8	-63.8	-8.14		Tidikelt	g
Tid9	-61.9	-7.47		Tidikelt	g
Tid27				Tidikelt	g
Tid10	-74.2	-9.83	Tidikelt	Tidikelt	g
Tid11	-74.7	-9.5		Tidikelt	g
Tid12	-72.5	-9.54		Tidikelt	g
Tid13	-74.9	-9.44		Tidikelt	g
Tid14	-75.6	-9.45		Tidikelt	g
Tid15	-72.8	-9.15		Tidikelt	g
Tid16	-73.9	-9.12		Tidikelt	g
Tid17	-74.7	-8.56		Tidikelt	g
Tid18	-65.4	-8.37		Tidikelt	g
Tid19	-61.1	-8.15		Tidikelt	g
Tid20	-63.9	-8.34		Tidikelt	g
Tid21		-7.94		Tidikelt	g
Tid22	-64.1	-8.18		Tidikelt	g

## Sheet: page 4
Appendix. 4 PCA with and without clr transformation, and HCA with clr transformed data (every CAH title represents one excel sheet)
PCA and variation array with clr transformation
Table S9. Principal components and cumulative variance for the occidental basin.
Principal Components:
	clr.Ca	clr.Mg	clr.Na	clr.K	clr.HCO_3	clr.Cl	clr.SO_4	Cum.Prop.Exp.
PC1	0.1446	0.0751	-0.4	0.0349	0.7445	-0.4976	-0.1014	0.4047
PC2	-0.2249	-0.2489	0.0331	0.8601	-0.0185	-0.019	-0.3819	0.7749
PC3	0.3114	0.1863	-0.4426	0.3328	-0.4974	-0.3377	0.4473	0.8687
PC4	-0.4537	0.7819	-0.2994	0.026	-0.044	0.2073	-0.218	0.9423
PC5	0.4732	-0.1764	-0.5365	-0.0344	-0.0053	0.5963	-0.3169	0.9838
PC6	-0.5089	-0.3351	-0.3502	0.059	0.2303	0.3108	0.5941	1
Table S10. Variation matrix (array) for the occidental basin (7 variables excluding NO3−). The lower triangle provides the variation element (tij) for all variable pairs - the smaller the variation element, the greater the proportionality between the two variables. The upper triangle contains a transformation of each variation element, which provides an approximate index of proportionality for ea…
Variation array:
	Variance ln(Xi/Xj)
Xi\Xj	Ca	Mg	Na	K	HCO_3	Cl	SO_4	clr
								variances
Ca		0.22	0.398	0.7775	0.4162	0.4363	0.1397	0.1066
Mg	-0.79		0.4093	0.8264	0.4949	0.384	0.1871	0.1257
Na	0.3758	1.1658		0.6684	0.9084	0.1397	0.3137	0.1708
K	-2.2195	-1.4295	-2.5953		0.9113	0.7601	0.9722	0.4677
HCO_3	0.161	0.951	-0.2148	2.3805		1.0614	0.707	0.4082
Cl	0.7956	1.5855	0.4197	3.0151	0.6345		0.36	0.2143
SO_4	1.0824	1.8723	0.7066	3.3019	0.9214	0.2868		0.1483
	Mean ln(Xi/Xj)							1.6417	Total Variance
Table S11. Principal components and cumulative variance for the oriental basin.
Principal Components:
	clr.Ca	clr.Mg	clr.Na	clr.K	clr.HCO_3	clr.Cl	clr.SO_4	Cum.Prop.Exp.
PC1	0.105	0.3519	-0.1085	-0.7926	0.4567	-0.097	0.0845	0.484
PC2	-0.0648	-0.0705	0.4853	-0.4566	-0.5191	0.5149	0.1108	0.7568
PC3	0.5332	-0.5929	0.1225	-0.1293	-0.0207	-0.3615	0.4487	0.861
PC4	-0.1572	-0.525	0.3685	-0.0404	0.5805	0.2027	-0.429	0.9493
PC5	0.641	-0.0896	-0.4456	-0.0452	-0.0909	0.4463	-0.416	0.99
PC6	-0.3493	-0.3052	-0.5103	-0.0066	0.1828	0.4601	0.5285	1
Table S12. Variation matrix (array) for the oriental basin (7 variables excluding NO3−). The lower triangle provides the variation element (tij) for all variable pairs - the smaller the variation element, the greater the proportionality between the two variables. The upper triangle contains a transformation of each variation element, which provides an approximate index of proportionality for each…
Variation array:
	Variance ln(Xi/Xj)
Xi\Xj	Ca	Mg	Na	K	HCO_3	Cl	SO_4	clr
								variances
Ca		0.2719	0.2712	0.6944	0.3073	0.2983	0.096	0.0782
Mg	-0.8483		0.4401	1.0002	0.2847	0.363	0.2348	0.1719
Na	0.2939	1.1422		0.6943	0.6203	0.0959	0.1869	0.131
K	-2.4546	-1.6062	-2.7485		1.1023	0.7158	0.719	0.5049
HCO_3	-0.099	0.7493	-0.3929	2.3556		0.664	0.4087	0.2851
Cl	0.745	1.5933	0.4511	3.1995	0.844		0.2705	0.1452
SO_4	1.2277	2.076	0.9338	3.6823	1.3267	0.4827		0.075
PCA and statistics without clr transformation
I. The Oriental basin
Table S13. Correlation matrix for the Oriental basin (Pearson (n)):
Variables	Ca	Mg	Na	K	Cl	SO_4	HCO_3
Ca	1	0.407036	0.723672	0.606358	0.69789	0.838902	-0.0832991
Mg	0.407036	1	0.397581	0.071201	0.506283	0.415025	-0.0212365
Na	0.723672	0.397581	1	0.507339	0.971972	0.518656	-0.221721
K	0.606358	0.071201	0.507339	1	0.470895	0.535316	-0.25168
Cl	0.69789	0.506283	0.971972	0.470895	1	0.437024	-0.229608
SO_4	0.838902	0.415025	0.518656	0.535316	0.437024	1	-0.115999
HCO_3	-0.0832991	-0.0212365	-0.221721	-0.25168	-0.229608	-0.115999	1
Values in bold are different from 0 with a significance level alpha=0.05
Table S14. Factor loadings for the Oriental basin:
	F1	F2	F3	F4	F5	F6	F7
Ca	0.90638	0.0982537	0.271965	0.0495735	-0.177099	0.246693	-0.0133072
Mg	0.545009	0.548092	-0.418794	0.385557	0.279645	0.0135984	-0.0114974
Na	0.893383	-0.0186769	-0.215959	-0.354239	-0.114247	-0.116995	-0.0515209
K	0.683208	-0.405961	0.411364	-0.0756369	0.439657	-0.0133441	-0.00200233
Cl	0.880017	0.0356714	-0.331438	-0.332807	-0.0101029	0.00968973	0.059083
SO_4	0.784634	0.100878	0.383379	0.395113	-0.204381	-0.170215	0.018314
HCO_3	-0.263855	0.774185	0.437788	-0.363608	0.0793839	-0.0290225	0.00242698
Table S15. Correlations between variables and factors for the Oriental basin:
	F1	F2	F3	F4	F5	F6	F7
Ca	0.90638	0.0982537	0.271965	0.0495735	-0.177099	0.246693	-0.0133072
Mg	0.545009	0.548092	-0.418794	0.385557	0.279645	0.0135984	-0.0114974
Na	0.893383	-0.0186769	-0.215959	-0.354239	-0.114247	-0.116995	-0.0515209
K	0.683208	-0.405961	0.411364	-0.0756369	0.439657	-0.0133441	-0.00200233
Cl	0.880017	0.0356714	-0.331438	-0.332807	-0.0101029	0.00968973	0.059083
SO_4	0.784634	0.100878	0.383379	0.395113	-0.204381	-0.170215	0.018314
HCO_3	-0.263855	0.774185	0.437788	-0.363608	0.0793839	-0.0290225	0.00242698
Fig. S5. PCA analysis shows the statistical description of the whole set of Data of the Oriental basin. The projection of variables was performed on F1 and F2 yielding maximum variance (F1 and F2 display 54.90 % and 15.51 % respectively).
II. The Occidental basin
Table S16. Correlation matrix (Pearson (n)):
Variables	Ca	Mg	Na	K	Cl	SO_4	HCO_3
Ca	1	0.81377	0.767531	0.449553	0.779515	0.917733	0.145186
Mg	0.81377	1	0.75109	0.402076	0.808792	0.81073	0.118974
Na	0.767531	0.75109	1	0.681283	0.967278	0.658563	0.0151125
K	0.449553	0.402076	0.681283	1	0.639991	0.322054	0.0949138
Cl	0.779515	0.808792	0.967278	0.639991	1	0.641632	0.0336321
SO_4	0.917733	0.81073	0.658563	0.322054	0.641632	1	0.113768
HCO_3	0.145186	0.118974	0.0151125	0.0949138	0.0336321	0.113768	1
Values in bold are different from 0 with a significance level alpha=0.05
Table S17. Factor loadings:
	F1	F2	F3	F4	F5	F6	F7
Ca	0.920713	0.113603	-0.239534	0.171993	-0.146251	0.173437	-0.0308877
Mg	0.89479	0.0722067	-0.231147	-0.17328	0.330953	0.0216336	-0.0261681
Na	0.928333	-0.180191	0.18231	-0.170876	-0.161389	-0.111843	-0.0688401
K	0.647112	-0.158809	0.674841	0.291859	0.123874	0.008545	0.00405329
Cl	0.933636	-0.152672	0.144036	-0.26197	-0.0798627	0.0447326	0.0852126
SO_4	0.849096	0.146582	-0.410117	0.259371	-0.0161908	-0.142357	0.039412
HCO_3	0.125401	0.948289	0.280536	-0.0732708	-0.0279561	-0.0130391	0.000917668
Table S18. Correlations between variables and factors:
	F1	F2	F3	F4	F5	F6	F7
Ca	0.920713	0.113603	-0.239534	0.171993	-0.146251	0.173437	-0.0308877
Mg	0.89479	0.0722067	-0.231147	-0.17328	0.330953	0.0216336	-0.0261681
Na	0.928333	-0.180191	0.18231	-0.170876	-0.161389	-0.111843	-0.0688401
K	0.647112	-0.158809	0.674841	0.291859	0.123874	0.008545	0.00405329
Cl	0.933636	-0.152672	0.144036	-0.26197	-0.0798627	0.0447326	0.0852126
SO_4	0.849096	0.146582	-0.410117	0.259371	-0.0161908	-0.142357	0.039412
HCO_3	0.125401	0.948289	0.280536	-0.0732708	-0.0279561	-0.0130391	0.000917668
Fig. S6. PCA analysis shows the statistical description of the whole set of Data of the Occidental basin. The projection of variables was performed on F1 and F2 yielding maximum variance (F1 and F2 display 64.82% and 14.57% respectively).
Table S19. CAH OBS OCCIDENTAL	CAH OBS OCCIDENTAL
	XLSTAT 2009.1.02 - Classification Ascendante Hiérarchique (CAH) - le 14-Aug-22 à 2:40:22 PM
	Tableau observations/variables : Classeur = Results -- calculs.xlsx / Feuille = Occidental data trans / Plage = 'Occidental data trans'!$J:$P / 192 lignes et 7 colonnes
	Libellés des lignes : Classeur = Results -- calculs.xlsx / Feuille = Occidental data trans / Plage = 'Occidental data trans'!$A:$A / 192 lignes et 1 colonne
	Regrouper les lignes
	Dissimilarité : Distance euclidienne
	Méthode d'agrégation : Méthode de Ward
	Centrer : Non
	Réduire : Non
	Troncature : Automatique
	Statistiques descriptives :
	Variable	Observations	Obs. avec données manquantes	Obs. sans données manquantes	Minimum	Maximum	Moyenne	Ecart-type
	clr.Ca	192	0	192	-0.885333	1.10546	0.084944	0.3273
	clr.Mg	192	0	192	-1.60182	0.35524	-0.705009	0.355507
	clr.Na	192	0	192	-1.05615	1.83529	0.460776	0.414404
	clr.K	192	0	192	-4.14473	-0.685312	-2.13455	0.685708
	clr.HCO_3	192	0	192	-2.10659	2.14688	0.245988	0.640592
	clr.Cl	192	0	192	-1.10184	1.91	0.880511	0.464105
	clr.SO_4	192	0	192	0.0566119	2.54193	1.16734	0.386081
	Statistiques des noeuds :
	Noeud	Niveau	Poids	Objets	Fils gauche	Fils droit
	383	88.835	192	192	382	377
	382	74.24	115	115	381	380
	381	18.4334	76	76	378	374
	380	13.8881	39	39	351	379
	379	12.5076	33	33	369	373
	378	10.6566	32	32	372	368
	377	10.2994	77	77	362	376
	376	8.79578	62	62	365	375
	375	5.7767	60	60	363	370
	374	5.52513	44	44	353	367
	373	5.06807	25	25	360	371
	372	4.14578	8	8	6	352
	371	3.39244	22	22	364	346
	370	2.94157	35	35	366	359
	369	2.67459	8	8	328	311
	368	2.46905	24	24	355	358
	367	2.08996	31	31	347	357
	366	1.87381	11	11	114	349
	365	1.85326	2	2	132	145
	364	1.72734	13	13	361	348
	363	1.66903	25	25	326	354
	362	1.40174	15	15	350	342
	361	1.37508	6	6	344	314
	360	1.22307	3	3	16	339
	359	1.22158	24	24	356	330
	358	1.19155	21	21	345	300
	357	1.07359	14	14	291	337
	356	1.04437	8	8	306	334
	355	1.02406	3	3	13	254
	354	0.984444	18	18	274	324
	353	0.945186	13	13	318	341
	352	0.938275	7	7	338	281
	351	0.936673	6	6	86	288
	350	0.872619	8	8	322	335
	349	0.776799	10	10	336	343
	348	0.776006	7	7	103	340
	347	0.692191	17	17	333	312
	346	0.667063	9	9	317	158
	345	0.608372	13	13	325	331
	344	0.605166	3	3	327	10
	343	0.586768	7	7	155	320
	342	0.571079	7	7	303	323
	341	0.553128	11	11	277	305
	340	0.507696	6	6	321	119
	339	0.506691	2	2	22	157
	338	0.47188	5	5	12	332
	337	0.464747	10	10	290	309
	336	0.463276	3	3	123	299
	335	0.442044	6	6	313	329
	334	0.407911	6	6	294	304
	333	0.401497	11	11	280	308
	332	0.378001	4	4	284	319
	331	0.374897	8	8	301	268
	330	0.365847	16	16	316	310
	329	0.339404	4	4	125	302
	328	0.331835	4	4	237	297
	327	0.307675	2	2	1	8
	326	0.299759	7	7	172	315
	325	0.293851	5	5	71	287
	324	0.284684	12	12	295	289
	323	0.277214	3	3	131	264
	322	0.27299	2	2	118	126
	321	0.241292	5	5	233	230
	320	0.236468	6	6	279	272
	319	0.233377	2	2	2	18
	318	0.220951	2	2	3	19
	317	0.214989	8	8	307	112
	316	0.213882	2	2	165	185
	315	0.210805	6	6	130	278
	314	0.209147	3	3	25	298
	313	0.205481	2	2	124	127
	312	0.197101	6	6	218	282
	311	0.196032	4	4	293	201
	310	0.18911	14	14	292	261
	309	0.180096	5	5	263	245
	308	0.165503	7	7	285	247
	307	0.164396	7	7	255	206
	306	0.163199	2	2	115	122
	305	0.160808	6	6	296	66
	304	0.160284	2	2	129	183
	303	0.148139	4	4	256	222
	302	0.14737	3	3	236	152
	301	0.146233	6	6	262	199
	300	0.144568	8	8	259	283
	299	0.13501	2	2	117	133
	298	0.134053	2	2	7	26
	297	0.133837	2	2	87	101
	296	0.13366	5	5	28	270
	295	0.133165	8	8	286	276
	294	0.133065	4	4	135	273
	293	0.127596	2	2	4	97
	292	0.122204	9	9	269	275
	291	0.120251	4	4	267	84
	290	0.118933	5	5	213	246
	289	0.116131	4	4	244	241
	288	0.109173	5	5	108	260
	287	0.107059	4	4	271	73
	286	0.10512	5	5	234	232
	285	0.100215	3	3	242	46
	284	0.0996931	2	2	9	11
	283	0.0963721	5	5	57	258
	282	0.0898478	4	4	248	250
	281	0.0894375	2	2	17	20
	280	0.0841388	4	4	239	253
	279	0.0801837	2	2	128	147
	278	0.0783148	5	5	251	174
	277	0.0752047	5	5	257	223
	276	0.0724697	3	3	154	266
	275	0.0722659	7	7	212	249
	274	0.0701589	6	6	179	265
	273	0.0673744	3	3	120	238
	272	0.064301	4	4	228	243
	271	0.0597166	3	3	61	235
	270	0.0558168	4	4	30	252
	269	0.0554765	2	2	148	167
	268	0.0550168	2	2	72	77
	267	0.0542981	3	3	76	197
	266	0.053821	2	2	149	166
	265	0.0532409	5	5	229	181
	264	0.0521738	2	2	163	191
	263	0.0515863	3	3	54	219
	262	0.0508601	4	4	225	200
	261	0.0489024	5	5	182	240
	260	0.0486811	4	4	193	205
	259	0.0481995	3	3	5	231
	258	0.047902	4	4	80	227
	257	0.0476034	2	2	34	36
	256	0.0475058	2	2	116	134
	255	0.0469751	5	5	215	104
	254	0.0428753	2	2	14	15
	253	0.0426539	2	2	38	45
	252	0.0408077	3	3	214	32
	251	0.0407888	4	4	171	221
	250	0.0399523	2	2	24	83
	249	0.0382601	4	4	204	189
	248	0.0380616	2	2	21	68
	247	0.0375019	4	4	217	47
	246	0.0353225	3	3	50	203
	245	0.0352568	2	2	27	85
	244	0.0345981	2	2	137	188
	243	0.0310891	2	2	175	184
	242	0.0310882	2	2	41	44
	241	0.0286166	2	2	153	190
	240	0.0283803	4	4	161	226
	239	0.0257119	2	2	39	40
	238	0.0254469	2	2	143	164
	237	0.0250713	2	2	99	100
	236	0.0250087	2	2	113	121
	235	0.024834	2	2	55	64
	234	0.0239624	3	3	139	220
	233	0.0238569	2	2	90	91
	232	0.0234672	2	2	140	142
	231	0.0232638	2	2	58	62
	230	0.0216494	3	3	89	202
	229	0.0215831	4	4	208	211
	228	0.0209726	2	2	176	177
	227	0.0201369	3	3	59	216
	226	0.0183296	3	3	168	224
	225	0.0171432	2	2	56	63
	224	0.0168471	2	2	136	192
	223	0.0163373	3	3	210	37
	222	0.0155277	2	2	150	151
	221	0.0149597	3	3	196	173
	220	0.0148891	2	2	138	141
	219	0.0148083	2	2	52	70
	218	0.0147932	2	2	67	69
	217	0.0145499	3	3	23	194
	216	0.013039	2	2	81	82
	215	0.0118176	4	4	92	209
	214	0.0116508	2	2	29	31
	213	0.0111094	2	2	48	49
	212	0.00964034	3	3	186	207
	211	0.00927511	2	2	144	178
	210	0.00892082	2	2	33	35
	209	0.00831242	3	3	93	198
	208	0.00829413	2	2	146	156
	207	0.00816258	2	2	180	187
	206	0.00813965	2	2	105	106
	205	0.0078109	2	2	107	111
	204	0.00774775	3	3	195	162
	203	0.00740603	2	2	51	53
	202	0.00732463	2	2	88	95
	201	0.00609989	2	2	98	102
	200	0.00536562	2	2	60	65
	199	0.00506619	2	2	74	75
	198	0.00354455	2	2	94	96
	197	0.0034513	2	2	78	79
	196	0.00265209	2	2	169	170
	195	0.0024856	2	2	159	160
	194	0.00117367	2	2	42	43
	193	0.000650889	2	2	109	110
	Décomposition de la variance pour la classification optimale :
	Intra-classe	0.804879
	Inter-classes	0.845368
	Totale	1.65025
	Barycentres des classes :
	Classe	clr.Ca	clr.Mg	clr.Na	clr.K	clr.HCO_3	clr.Cl	clr.SO_4
	1	0.226434	-0.6233	-0.0972885	-1.79933	1.11713	0.275306	0.901055
	2	0.194244	-0.508453	0.48941	-2.818	0.25493	0.940376	1.4475
	3	-0.0946002	-0.940398	0.715169	-1.62975	-0.204065	1.12796	1.02569
	Distances entre les barycentres des classes :
		1	2	3
	1	0	1.69718	1.83863
	2	1.69718	0	1.46857
	3	1.83863	1.46857	0
	Objets centraux :
	Classe	clr.Ca	clr.Mg	clr.Na	clr.K	clr.HCO_3	clr.Cl	clr.SO_4
	1 (lnb 01)	0.105992	-0.81629	0.146131	-1.70298	0.998102	0.391966	0.877079
	2 (Daia Ben Dahoua)	0.225243	-0.601435	0.583791	-2.7458	0.0845433	0.91839	1.53526
	3 (Aou 01)	-0.16694	-0.812731	0.673647	-1.67018	-0.259745	1.1566	1.07935
	Distances entre les objets centraux :
		1 (lnb 01)	2 (Daia Ben Dahoua)	3 (Aou 01)
	1 (lnb 01)	0	1.69833	1.6005
	2 (Daia Ben Dahoua)	1.69833	0	1.32159
	3 (Aou 01)	1.6005	1.32159	0
	Résultats par classe :
	Classe	1	2	3
	Objets	39	76	77
	Somme des poids	39	76	77
	Variance intra-classe	1.26962	0.751305	0.625378
	Distance minimale au barycentre	0.385538	0.246874	0.178018
	Distance moyenne au barycentre	1.0307	0.780783	0.679775
	Distance maximale au barycentre	1.6677	2.72971	2.55258
		El-Assafia 1	Djebel Makrane (U1)	Tim 01
		LAG 02	LAG 01	Tim 02
		LAG 05	LAG 03	Tim 03
		LAG 06	LAG 04	Tim 04
		LAG 08	LAG 07	Tim 05
		LAG 14	LAG 09	Tim 06
		LAG 20	LAG 10	Tim 08
		LAG 23	LAG 11	Tim 09
		LAG 24	LAG 12	Tim 10
		Elm 01	LAG 13	Tim 11
		Elm 02	LAG 15	Tim 12
		Gl01	LAG 16	Tim 13
		Gl02	LAG 17	Tim 14
		Gl03	LAG 18	Tim 15
		Gl04	LAG 19	Tim 16
		Gl05	LAG 21	Tim 17
		Gl06	LAG 22	Tim 18
		Gl07	Hassi-Dalaa	Tim 19
		Gl08	FX1	Tim 20
		Gl09	FX2	Tim 21
		Gl10	FX3	Adr 01
		Gl11	NK1	Adr 02
		Gl12	SM5	Adr 03
		Gl13	CVZGuerrara	Adr 04
		Gl14	GTF	Adr 05
		Hg01	FS	Adr 06
		Hg02	DR	Adr 07
		Hg03	KN	Adr 08
		Hg04	Gr01	Adr 09
		Hg05	Gr02	Adr 10
		kb602	Gr03	Adr 11
		kb603	Zf01	Adr 12
		kb604	Zf02	Adr 13
		kb605	Zf03	Adr 14
		kb606	Zf04	Adr 15
		lnb 01	Guerrara:Laameyed	Adr 16
		Tim 07	Zelfana 1	Adr 17
		Krz 01	Zelfana 8 (Fedj Enaam)	Adr 18
		Krz02	Br01	Adr 19
			Br02	Adr 20
			Br03	Reg 01
			GHA 02	Reg 02
			GHA 03	Reg 03
			GHA 04	Tid1
			Berriane 2	Tid2
			Bn01	Tid3
			Bn02	Tid4
			Dy01	Tid5
			Dy02	Tid6
			Gd01	Tid7
			Gd02	Tid8
			Gd03	Tid9
			Gd04	Tid27
			Gd05	Tid10
			Gd06	Tid11
			Tf01	Tid12
			GHA 01	Tid13
			Bouheraroua	Tid14
			Bensmara 1	Tid15
			Daia Ben Dahoua	Tid16
			Laroui	Tid17
			Mt00	Tid18
			Mt01	Tid19
			Mt02	Tid20
			Mt03	Tid21
			Mt04	Tid22
			Mt05	Tid24
			Mr01	Tid25
			Mr02	Tid26
			Mr03	Tid28
			Sb01	Tid29
			Sb02	Tid30
			Sb03	Aou 01
			Sb04	Aou 02
			Hf01	Aou 03
			Hf02	Aou 04
				Aou 05
	Résultats par objet :
	Observation	Classe
	El-Assafia 1	1
	Djebel Makrane (U1)	2
	LAG 01	2
	LAG 02	1
	LAG 03	2
	LAG 04	2
	LAG 05	1
	LAG 06	1
	LAG 07	2
	LAG 08	1
	LAG 09	2
	LAG 10	2
	LAG 11	2
	LAG 12	2
	LAG 13	2
	LAG 14	1
	LAG 15	2
	LAG 16	2
	LAG 17	2
	LAG 18	2
	LAG 19	2
	LAG 20	1
	LAG 21	2
	LAG 22	2
	LAG 23	1
	LAG 24	1
	Hassi-Dalaa	2
	FX1	2
	FX2	2
	FX3	2
	NK1	2
	SM5	2
	CVZGuerrara	2
	GTF	2
	FS	2
	DR	2
	KN	2
	Gr01	2
	Gr02	2
	Gr03	2
	Zf01	2
	Zf02	2
	Zf03	2
	Zf04	2
	Guerrara:Laameyed	2
	Zelfana 1	2
	Zelfana 8 (Fedj Enaam)	2
	Br01	2
	Br02	2
	Br03	2
	GHA 02	2
	GHA 03	2
	GHA 04	2
	Berriane 2	2
	Bn01	2
	Bn02	2
	Dy01	2
	Dy02	2
	Gd01	2
	Gd02	2
	Gd03	2
	Gd04	2
	Gd05	2
	Gd06	2
	Tf01	2
	GHA 01	2
	Bouheraroua	2
	Bensmara 1	2
	Daia Ben Dahoua	2
	Laroui	2
	Mt00	2
	Mt01	2
	Mt02	2
	Mt03	2
	Mt04	2
	Mt05	2
	Mr01	2
	Mr02	2
	Mr03	2
	Sb01	2
	Sb02	2
	Sb03	2
	Sb04	2
	Hf01	2
	Hf02	2
	Elm 01	1
	Elm 02	1
	Gl01	1
	Gl02	1
	Gl03	1
	Gl04	1
	Gl05	1
	Gl06	1
	Gl07	1
	Gl08	1
	Gl09	1
	Gl10	1
	Gl11	1
	Gl12	1
	Gl13	1
	Gl14	1
	Hg01	1
	Hg02	1
	Hg03	1
	Hg04	1
	Hg05	1
	kb602	1
	kb603	1
	kb604	1
	kb605	1
	kb606	1
	lnb 01	1
	Tim 01	3
	Tim 02	3
	Tim 03	3
	Tim 04	3
	Tim 05	3
	Tim 06	3
	Tim 07	1
	Tim 08	3
	Tim 09	3
	Tim 10	3
	Tim 11	3
	Tim 12	3
	Tim 13	3
	Tim 14	3
	Tim 15	3
	Tim 16	3
	Tim 17	3
	Tim 18	3
	Tim 19	3
	Tim 20	3
	Tim 21	3
	Adr 01	3
	Adr 02	3
	Adr 03	3
	Adr 04	3
	Adr 05	3
	Adr 06	3
	Adr 07	3
	Adr 08	3
	Adr 09	3
	Adr 10	3
	Adr 11	3
	Adr 12	3
	Adr 13	3
	Adr 14	3
	Adr 15	3
	Adr 16	3
	Adr 17	3
	Adr 18	3
	Adr 19	3
	Adr 20	3
	Reg 01	3
	Reg 02	3
	Reg 03	3
	Krz 01	1
	Krz02	1
	Tid1	3
	Tid2	3
	Tid3	3
	Tid4	3
	Tid5	3
	Tid6	3
	Tid7	3
	Tid8	3
	Tid9	3
	Tid27	3
	Tid10	3
	Tid11	3
	Tid12	3
	Tid13	3
	Tid14	3
	Tid15	3
	Tid16	3
	Tid17	3
	Tid18	3
	Tid19	3
	Tid20	3
	Tid21	3
	Tid22	3
	Tid24	3
	Tid25	3
	Tid26	3
	Tid28	3
	Tid29	3
	Tid30	3
	Aou 01	3
	Aou 02	3
	Aou 03	3
	Aou 04	3
	Aou 05	3
Table S 20. CAH VAR OCCIDENTAL BASIN	CAH VAR OCCIDENTAL BASIN
	XLSTAT 2009.1.02 - Classification Ascendante Hiérarchique (CAH) - le 14-Aug-22 à 2:42:14 PM
	Tableau observations/variables : Classeur = Results -- calculs.xlsx / Feuille = Occidental data trans / Plage = 'Occidental data trans'!$J:$P / 192 lignes et 7 colonnes
	Libellés des lignes : Classeur = Results -- calculs.xlsx / Feuille = Occidental data trans / Plage = 'Occidental data trans'!$A:$A / 192 lignes et 1 colonne
	Regrouper les colonnes
	Dissimilarité : Distance euclidienne
	Méthode d'agrégation : Méthode de Ward
	Centrer : Non
	Réduire : Non
	Troncature : Automatique
	Statistiques descriptives :
	Variable	Observations	Obs. avec données manquantes	Obs. sans données manquantes	Minimum	Maximum	Moyenne	Ecart-type
	clr.Ca	192	0	192	-0.885333	1.10546	0.084944	0.3273
	clr.Mg	192	0	192	-1.60182	0.35524	-0.705009	0.355507
	clr.Na	192	0	192	-1.05615	1.83529	0.460776	0.414404
	clr.K	192	0	192	-4.14473	-0.685312	-2.13455	0.685708
	clr.HCO_3	192	0	192	-2.10659	2.14688	0.245988	0.640592
	clr.Cl	192	0	192	-1.10184	1.91	0.880511	0.464105
	clr.SO_4	192	0	192	0.0566119	2.54193	1.16734	0.386081
	Statistiques des noeuds :
	Noeud	Niveau	Poids	Objets	Fils gauche	Fils droit
	13	1125.39	7	7	4	12
	12	351.893	6	6	11	10
	11	129.423	3	3	2	9
	10	70.2253	3	3	8	7
	9	42.4452	2	2	1	5
	8	30.3256	2	2	3	6
	Décomposition de la variance pour la classification optimale :
	Intra-classe	47.6653
	Inter-classes	243.951
	Totale	291.616
	Barycentres des classes :
	Classe	El-Assafia 1	Djebel Makrane (U1)	LAG 01	LAG 02	LAG 03	LAG 04	LAG 05	LAG 06	LAG 07	LAG 08	LAG 09	LAG 10	LAG 11	LAG 12	LAG 13	LAG 14	LAG 15	LAG 16	LAG 17	LAG 18	LAG 19	LAG 20	LAG 21	LAG 22	LAG 23	LAG 24	Hassi-Dalaa	FX1	FX2	FX3	NK1	SM5	CVZGuerrara	GTF	FS	DR	KN	Gr01	Gr02	Gr03	Zf01	Zf02	Zf03	Zf04	Guerrara:Laameyed	Zelfana 1	Zelfana 8 (Fedj Enaam)	Br01
	1	0.555846	0.554724	-0.211489	0.848198	0.273971	0.596818	0.737656	0.167709	0.459702	0.797092	0.420288	0.599793	-0.0187101	-0.0592464	0.0412765	1.41607	0.340845	0.629556	0.0268197	0.273335	0.200343	1.24471	0.185808	0.23143	0.566826	0.855288	0.21358	0.096442	-0.0605368	-0.0595271	-0.0498846	0.0091068	-0.0550493	-0.218843	-0.109017	-0.163159	-0.0932823	0.133007	0.123227	0.0883042	0.154618	0.246922	0.257942	0.251124	0.102571	0.100913	0.164737	0.447683
	2	-0.441927	-0.477282	0.102303	-0.681038	-0.438675	-0.0498382	-0.481563	-0.202264	-0.00432719	-0.174472	0.0849246	0.00415073	0.256751	-0.524003	-0.508471	-0.489571	-0.287083	-0.451186	-0.109727	-0.0857527	-0.432269	-0.588635	-0.671585	-0.485956	-0.520113	-0.409093	-0.697388	-0.34509	-0.0934837	0.0132962	-0.086323	-0.145361	-0.195774	-0.162506	-0.184681	-0.0389306	-0.183545	-0.783818	-0.718158	-0.683798	-0.744236	-0.760196	-0.749689	-0.765914	-0.772153	-0.806863	-0.830918	-0.833981
	3	0.583109	0.767624	0.889129	0.284508	1.16396	0.367064	0.423825	0.641735	0.719875	0.315185	0.683629	0.675949	1.30847	1.39809	1.36693	-0.302134	1.01691	0.794851	0.912597	1.01151	0.873589	0.100479	0.934131	0.866245	0.603997	0.383198	0.788111	0.943492	0.971321	0.952817	0.943791	0.888201	0.877648	0.921351	0.915792	0.925911	0.865075	0.926115	0.968215	0.919395	1.05367	0.909444	0.913215	0.993472	0.87356	1.0402	0.98611	0.785936
	4	-2.41909	-2.93504	-2.34671	-1.86888	-3.60113	-2.24499	-2.26522	-2.05836	-3.0747	-2.36527	-2.97639	-3.23158	-4.14473	-3.55177	-3.67488	-1.43617	-3.44533	-3.19248	-2.6817	-3.49544	-2.58919	-2.20223	-2.50243	-2.57564	-2.42553	-2.45108	-2.09411	-2.67827	-2.6994	-2.75269	-2.64528	-2.53745	-2.32707	-2.16386	-2.34466	-2.41249	-2.22512	-2.26054	-2.43294	-2.25099	-2.72601	-2.46198	-2.50584	-2.71675	-2.05367	-2.51556	-2.45689	-2.41919
	Distances entre les barycentres des classes :
		1	2	3	4
	1	0	13.9332	12.8792	34.0271
	2	13.9332	0	22.3934	23.4743
	3	12.8792	22.3934	0	42.7875
	4	34.0271	23.4743	42.7875	0
	Objets centraux :
	Classe	El-Assafia 1	Djebel Makrane (U1)	LAG 01	LAG 02	LAG 03	LAG 04	LAG 05	LAG 06	LAG 07	LAG 08	LAG 09	LAG 10	LAG 11	LAG 12	LAG 13	LAG 14	LAG 15	LAG 16	LAG 17	LAG 18	LAG 19	LAG 20	LAG 21	LAG 22	LAG 23	LAG 24	Hassi-Dalaa	FX1	FX2	FX3	NK1	SM5	CVZGuerrara	GTF	FS	DR	KN	Gr01	Gr02	Gr03	Zf01	Zf02	Zf03	Zf04	Guerrara:Laameyed	Zelfana 1	Zelfana 8 (Fedj Enaam)	Br01
	1 (clr.HCO_3)	0.50765	0.283838	-0.257699	1.49841	0.215009	0.0881783	1.11423	-0.00708675	0.38319	0.990022	0.48238	0.665327	-0.455849	-0.309909	-0.0730151	1.89878	0.0670884	0.628169	-0.306797	-0.0865216	0.244027	1.6541	0.353545	0.390241	0.933106	1.42907	0.255271	0.395187	-0.0043837	0.118491	0.0695435	0.187125	0.0902799	-0.160338	-0.0191159	-0.0595749	0.0326981	0.192693	0.0876542	0.0171233	0.182566	0.401503	0.41295	0.391906	0.108631	0.0659777	0.275557	0.742376
	2 (clr.Mg)	-0.441927	-0.477282	0.102303	-0.681038	-0.438675	-0.0498382	-0.481563	-0.202264	-0.00432719	-0.174472	0.0849246	0.00415073	0.256751	-0.524003	-0.508471	-0.489571	-0.287083	-0.451186	-0.109727	-0.0857527	-0.432269	-0.588635	-0.671585	-0.485956	-0.520113	-0.409093	-0.697388	-0.34509	-0.0934837	0.0132962	-0.086323	-0.145361	-0.195774	-0.162506	-0.184681	-0.0389306	-0.183545	-0.783818	-0.718158	-0.683798	-0.744236	-0.760196	-0.749689	-0.765914	-0.772153	-0.806863	-0.830918	-0.833981
	3 (clr.Cl)	0.45259	0.392052	0.774185	-0.651006	1.18039	-1.10184	0.162998	0.278282	0.551636	-0.0249405	0.703563	-0.00176645	1.47567	1.70086	1.70744	-0.331165	0.96675	0.782584	0.755773	0.71858	1.03189	0.787232	0.965007	0.832593	0.512307	0.090988	0.852536	1.07636	1.10618	1.18633	1.06758	0.996895	1.04355	0.962819	1.05868	1.02254	1.08956	0.937318	1.13693	1.13971	1.15724	0.945851	0.946828	1.03457	1.01524	1.22004	1.04967	0.756365
	4 (clr.K)	-2.41909	-2.93504	-2.34671	-1.86888	-3.60113	-2.24499	-2.26522	-2.05836	-3.0747	-2.36527	-2.97639	-3.23158	-4.14473	-3.55177	-3.67488	-1.43617	-3.44533	-3.19248	-2.6817	-3.49544	-2.58919	-2.20223	-2.50243	-2.57564	-2.42553	-2.45108	-2.09411	-2.67827	-2.6994	-2.75269	-2.64528	-2.53745	-2.32707	-2.16386	-2.34466	-2.41249	-2.22512	-2.26054	-2.43294	-2.25099	-2.72601	-2.46198	-2.50584	-2.71675	-2.05367	-2.51556	-2.45689	-2.41919
	Distances entre les objets centraux :
		1 (clr.HCO_3)	2 (clr.Mg)	3 (clr.Cl)	4 (clr.K)
	1 (clr.HCO_3)	0	16.391	16.7658	35.5391
	2 (clr.Mg)	16.391	0	23.588	23.4743
	3 (clr.Cl)	16.7658	23.588	0	43.4894
	4 (clr.K)	35.5391	23.4743	43.4894	0
	Résultats par classe :
	Classe	1	2	3	4
	Objets	2	1	3	1
	Somme des poids	2	1	3	1
	Variance intra-classe	42.4452	0	50.2754	0
	Distance minimale au barycentre	4.6068	0	3.8738	0
	Distance moyenne au barycentre	4.6068	0	5.64641	0
	Distance maximale au barycentre	4.6068	0	6.84228	0
		clr.Ca	clr.Mg	clr.Na	clr.K
		clr.HCO_3		clr.Cl
				clr.SO_4
	Résultats par objet :
	Observation	Classe
	clr.Ca	1
	clr.Mg	2
	clr.Na	3
	clr.K	4
	clr.HCO_3	1
	clr.Cl	3
	clr.SO_4	3
Table S21. CAH OBS ORIENTAL BASIN	CAH OBS ORIENTAL BASIN
	XLSTAT 2009.1.02 - Classification Ascendante Hiérarchique (CAH) - le 14-Aug-22 à 2:36:50 PM
	Tableau observations/variables : Classeur = Results -- calculs.xlsx / Feuille = Oriental data and clr-transform / Plage = 'Oriental data and clr-transform'!$J:$P / 142 lignes et 7 colonnes
	Libellés des lignes : Classeur = Results -- calculs.xlsx / Feuille = Oriental data and clr-transform / Plage = 'Oriental data and clr-transform'!$A:$A / 142 lignes et 1 colonne
	Regrouper les lignes
	Dissimilarité : Distance euclidienne
	Méthode d'agrégation : Méthode de Ward
	Centrer : Non
	Réduire : Non
	Troncature : Automatique
	Statistiques descriptives :
	Variable	Observations	Obs. avec données manquantes	Obs. sans données manquantes	Minimum	Maximum	Moyenne	Ecart-type
	clr.Ca	142	0	142	-0.520089	1.10546	0.162189	0.280697
	clr.Mg	142	0	142	-2.07448	0.256751	-0.686147	0.416067
	clr.Na	142	0	142	-1.05615	1.61578	0.456077	0.363286
	clr.K	142	0	142	-4.14473	-0.627006	-2.29238	0.713114
	clr.HCO_3	142	0	142	-1.90324	1.89878	0.0632018	0.535867
	clr.Cl	142	0	142	-1.10184	2.14808	0.907164	0.382347
	clr.SO_4	142	0	142	0.417724	2.54193	1.3899	0.274741
	Statistiques des noeuds :
	Noeud	Niveau	Poids	Objets	Fils gauche	Fils droit
	283	69.9355	142	142	282	280
	282	24.44	85	85	276	281
	281	18.8068	75	75	278	277
	280	14.3023	57	57	279	275
	279	8.5858	11	11	269	268
	278	6.81916	31	31	260	273
	277	5.55474	44	44	261	272
	276	5.19139	10	10	262	274
	275	4.47135	46	46	254	271
	274	3.65982	8	8	6	270
	273	2.46905	24	24	264	267
	272	2.2484	31	31	265	259
	271	2.01261	33	33	258	249
	270	1.95814	7	7	256	263
	269	1.68042	2	2	123	128
	268	1.44913	9	9	266	141
	267	1.19155	21	21	257	225
	266	1.19002	8	8	255	250
	265	1.07359	14	14	222	251
	264	1.02406	3	3	13	190
	263	1.00135	4	4	4	235
	262	0.972123	2	2	16	22
	261	0.945186	13	13	237	253
	260	0.938275	7	7	252	210
	259	0.793482	17	17	234	247
	258	0.74662	20	20	220	244
	257	0.608372	13	13	242	245
	256	0.605166	3	3	243	10
	255	0.560952	4	4	126	239
	254	0.556461	13	13	248	208
	253	0.553128	11	11	207	229
	252	0.47188	5	5	12	246
	251	0.464747	10	10	221	232
	250	0.431389	4	4	228	129
	249	0.41217	13	13	132	240
	248	0.403739	11	11	203	233
	247	0.397853	11	11	230	236
	246	0.378001	4	4	216	238
	245	0.374897	8	8	226	199
	244	0.369529	15	15	227	241
	243	0.307675	2	2	1	8
	242	0.293851	5	5	71	218
	241	0.269801	6	6	100	212
	240	0.266658	12	12	205	206
	239	0.250021	3	3	113	219
	238	0.233377	2	2	2	18
	237	0.220951	2	2	3	19
	236	0.216063	4	4	204	103
	235	0.209147	3	3	25	224
	234	0.197101	6	6	166	211
	233	0.196543	7	7	156	231
	232	0.180096	5	5	196	181
	231	0.169087	5	5	213	98
	230	0.165503	7	7	217	184
	229	0.160808	6	6	223	66
	228	0.156957	3	3	121	195
	227	0.150682	9	9	215	209
	226	0.146233	6	6	194	149
	225	0.144568	8	8	193	214
	224	0.134053	2	2	7	26
	223	0.13366	5	5	28	201
	222	0.120251	4	4	198	84
	221	0.118933	5	5	159	183
	220	0.111198	5	5	172	163
	219	0.107287	2	2	124	127
	218	0.107059	4	4	202	73
	217	0.100215	3	3	180	46
	216	0.0996931	2	2	9	11
	215	0.0983063	5	5	176	179
	214	0.0963721	5	5	57	192
	213	0.0910398	4	4	171	151
	212	0.0904467	5	5	200	160
	211	0.0898478	4	4	187	188
	210	0.0894375	2	2	17	20
	209	0.087818	4	4	101	173
	208	0.0755651	2	2	91	99
	207	0.0752047	5	5	191	168
	206	0.0692022	10	10	154	197
	205	0.0659637	2	2	89	135
	204	0.0638071	3	3	38	178
	203	0.0630148	4	4	157	186
	202	0.0597166	3	3	61	177
	201	0.0558168	4	4	30	189
	200	0.0550977	3	3	112	185
	199	0.0550168	2	2	72	77
	198	0.0542981	3	3	76	148
	197	0.0532271	8	8	170	182
	196	0.0515863	3	3	54	167
	195	0.0509835	2	2	122	125
	194	0.0508601	4	4	169	150
	193	0.0481995	3	3	5	175
	192	0.047902	4	4	80	174
	191	0.0476034	2	2	34	36
	190	0.0428753	2	2	14	15
	189	0.0408077	3	3	161	32
	188	0.0399523	2	2	24	83
	187	0.0380616	2	2	21	68
	186	0.0377397	2	2	86	97
	185	0.0376565	2	2	114	115
	184	0.0375019	4	4	165	47
	183	0.0353225	3	3	50	153
	182	0.0352641	5	5	140	158
	181	0.0352568	2	2	27	85
	180	0.0310882	2	2	41	44
	179	0.0266101	3	3	164	110
	178	0.0257119	2	2	39	40
	177	0.024834	2	2	55	64
	176	0.0240552	2	2	105	106
	175	0.0232638	2	2	58	62
	174	0.0201369	3	3	59	162
	173	0.0194256	3	3	152	111
	172	0.0193653	2	2	45	104
	171	0.0180152	2	2	92	93
	170	0.0171449	3	3	134	145
	169	0.0171432	2	2	56	63
	168	0.0163373	3	3	155	37
	167	0.0148083	2	2	52	70
	166	0.0147932	2	2	67	69
	165	0.0145499	3	3	23	143
	164	0.0142708	2	2	102	107
	163	0.0142124	3	3	147	118
	162	0.013039	2	2	81	82
	161	0.0116508	2	2	29	31
	160	0.0114891	2	2	119	120
	159	0.0111094	2	2	48	49
	158	0.0095612	4	4	139	146
	157	0.0094714	2	2	87	88
	156	0.00896658	2	2	90	96
	155	0.00892082	2	2	33	35
	154	0.00747135	2	2	137	138
	153	0.00740603	2	2	51	53
	152	0.00629335	2	2	108	109
	151	0.00562987	2	2	94	95
	150	0.00536562	2	2	60	65
	149	0.00506619	2	2	74	75
	148	0.0034513	2	2	78	79
	147	0.0031189	2	2	116	117
	146	0.00259808	3	3	131	144
	145	0.0018686	2	2	133	136
	144	0.00125312	2	2	130	142
	143	0.00117367	2	2	42	43
	Décomposition de la variance pour la classification optimale :
	Intra-classe	0.742436
	Inter-classes	0.658799
	Totale	1.40123
	Barycentres des classes :
	Classe	clr.Ca	clr.Mg	clr.Na	clr.K	clr.HCO_3	clr.Cl	clr.SO_4
	1	0.546596	-0.403851	-0.336482	-2.17368	1.01065	0.0175449	1.33923
	2	0.180386	-0.517546	0.505289	-2.82622	0.254595	0.970453	1.43304
	3	0.070805	-0.957517	0.530369	-1.61079	-0.35485	0.979964	1.34202
	Distances entre les barycentres des classes :
		1	2	3
	1	0	1.66429	2.09572
	2	1.66429	0	1.43641
	3	2.09572	1.43641	0
	Objets centraux :
	Classe	clr.Ca	clr.Mg	clr.Na	clr.K	clr.HCO_3	clr.Cl	clr.SO_4
	1 (LAG 05)	0.361079	-0.481563	-0.185783	-2.26522	1.11423	0.162998	1.29426
	2 (Daia Ben Dahoua)	0.225243	-0.601435	0.583791	-2.7458	0.0845433	0.91839	1.53526
	3 (11.0)	-0.0729117	-0.879388	0.655327	-1.71872	-0.343596	0.97691	1.38238
	Distances entre les objets centraux :
		1 (LAG 05)	2 (Daia Ben Dahoua)	3 (11.0)
	1 (LAG 05)	0	1.5953	2.03672
	2 (Daia Ben Dahoua)	1.5953	0	1.19844
	3 (11.0)	2.03672	1.19844	0
	Résultats par classe :
	Classe	1	2	3
	Objets	10	75	57
	Somme des poids	10	75	57
	Variance intra-classe	1.55987	0.664551	0.713981
	Distance minimale au barycentre	0.324737	0.252502	0.236189
	Distance moyenne au barycentre	1.06823	0.754926	0.69417
	Distance maximale au barycentre	1.9983	1.83346	2.51578
		El-Assafia 1	Djebel Makrane (U1)	Guerrara:Laameyed
		LAG 02	LAG 01	2
		LAG 04	LAG 03	7
		LAG 05	LAG 07	9
		LAG 06	LAG 09	11
		LAG 08	LAG 10	12
		LAG 14	LAG 11	16
		LAG 20	LAG 12	18
		LAG 23	LAG 13	19
		LAG 24	LAG 15	22
			LAG 16	23
			LAG 17	24
			LAG 18	26
			LAG 19	14
			LAG 21	G2
			LAG 22	Kh1
			Hassi-Dalaa	M3
			FX1	Tg01
			FX2	Og02
			FX3	El-Mir
			NK1	Blidet Omar 1989
			SM5	Ain-Sahara
			CVZGuerrara	Sidi-Slimane 1
			GTF	Sidi-Slimane 2
			FS	Meggarine
			DR	Ain-Choucha
			KN	Etteibat
			Gr01	Sehane El Berry
			Gr02	El Oued
			Gr03	Sidi-Mahdi
			Zf01	Khchem Er'rih
			Zf02	Hassi Ben Abdelleh 3
			Zf03	Hassi Ben Abdelleh 4
			Zf04	M'RARA MR3
			Zelfana 1	M'RARA MR4
			Zelfana 8 (Fedj Enaam)	NEFTA CI 1
			Br01	NEFTA CI 2
			Br02	TOZEUR CI 1
			Br03	TOZEUR CI 2
			GHA 02	TOZEUR CI 3
			GHA 03	EL-HAMMA C I2
			GHA 04	EL-HAMMA C I4
			Berriane 2	TAZRARIT CI 1
			Bn01	CEDADA CI 2
			Bn02	CHORFA CI 4
			Dy01	ZOUIA CI 5
			Dy02	MANSOURA CI 3
			Gd01	MANSOURA CI 13
			Gd02	KEBILI CI 10
			Gd03	KEBILI CI 16
			Gd04	TAOUARGHA CI 2
			Gd05	EL BHAIER CI 9
			Gd06	LIMAGUES CI 8
			Tf01	DEBABCHA CI 14
			GHA 01	SOUK EL AHAD CI 17
			Bouheraroua	MENCHIA CI 6
			Bensmara 1	SEFTIMI
			Daia Ben Dahoua
			Laroui
			Mt00
			Mt01
			Mt02
			Mt03
			Mt04
			Mt05
			Mr01
			Mr02
			Mr03
			Sb01
			Sb02
			Sb03
			Sb04
			Hf01
			Hf02
			Og01
	Résultats par objet :
	Observation	Classe
	El-Assafia 1	1
	Djebel Makrane (U1)	2
	LAG 01	2
	LAG 02	1
	LAG 03	2
	LAG 04	1
	LAG 05	1
	LAG 06	1
	LAG 07	2
	LAG 08	1
	LAG 09	2
	LAG 10	2
	LAG 11	2
	LAG 12	2
	LAG 13	2
	LAG 14	1
	LAG 15	2
	LAG 16	2
	LAG 17	2
	LAG 18	2
	LAG 19	2
	LAG 20	1
	LAG 21	2
	LAG 22	2
	LAG 23	1
	LAG 24	1
	Hassi-Dalaa	2
	FX1	2
	FX2	2
	FX3	2
	NK1	2
	SM5	2
	CVZGuerrara	2
	GTF	2
	FS	2
	DR	2
	KN	2
	Gr01	2
	Gr02	2
	Gr03	2
	Zf01	2
	Zf02	2
	Zf03	2
	Zf04	2
	Guerrara:Laameyed	3
	Zelfana 1	2
	Zelfana 8 (Fedj Enaam)	2
	Br01	2
	Br02	2
	Br03	2
	GHA 02	2
	GHA 03	2
	GHA 04	2
	Berriane 2	2
	Bn01	2
	Bn02	2
	Dy01	2
	Dy02	2
	Gd01	2
	Gd02	2
	Gd03	2
	Gd04	2
	Gd05	2
	Gd06	2
	Tf01	2
	GHA 01	2
	Bouheraroua	2
	Bensmara 1	2
	Daia Ben Dahoua	2
	Laroui	2
	Mt00	2
	Mt01	2
	Mt02	2
	Mt03	2
	Mt04	2
	Mt05	2
	Mr01	2
	Mr02	2
	Mr03	2
	Sb01	2
	Sb02	2
	Sb03	2
	Sb04	2
	Hf01	2
	Hf02	2
	2	3
	7	3
	9	3
	11	3
	12	3
	16	3
	18	3
	19	3
	22	3
	23	3
	24	3
	26	3
	14	3
	G2	3
	Kh1	3
	M3	3
	Tg01	3
	Og01	2
	Og02	3
	El-Mir	3
	Blidet Omar 1989	3
	Ain-Sahara	3
	Sidi-Slimane 1	3
	Sidi-Slimane 2	3
	Meggarine	3
	Ain-Choucha	3
	Etteibat	3
	Sehane El Berry	3
	El Oued	3
	Sidi-Mahdi	3
	Khchem Er'rih	3
	Hassi Ben Abdelleh 3	3
	Hassi Ben Abdelleh 4	3
	M'RARA MR3	3
	M'RARA MR4	3
	NEFTA CI 1	3
	NEFTA CI 2	3
	TOZEUR CI 1	3
	TOZEUR CI 2	3
	TOZEUR CI 3	3
	EL-HAMMA C I2	3
	EL-HAMMA C I4	3
	TAZRARIT CI 1	3
	CEDADA CI 2	3
	CHORFA CI 4	3
	ZOUIA CI 5	3
	MANSOURA CI 3	3
	MANSOURA CI 13	3
	KEBILI CI 10	3
	KEBILI CI 16	3
	TAOUARGHA CI 2	3
	EL BHAIER CI 9	3
	LIMAGUES CI 8	3
	DEBABCHA CI 14	3
	SOUK EL AHAD CI 17	3
	MENCHIA CI 6	3
	SEFTIMI	3
Table S22. CAH VAR ORIENTAL	CAH VAR ORIENTAL
	XLSTAT 2009.1.02 - Classification Ascendante Hiérarchique (CAH) - le 14-Aug-22 à 2:38:25 PM
	Tableau observations/variables : Classeur = Results -- calculs.xlsx / Feuille = Oriental data and clr-transform / Plage = 'Oriental data and clr-transform'!$J:$P / 142 lignes et 7 colonnes
	Regrouper les colonnes
	Dissimilarité : Distance euclidienne
	Méthode d'agrégation : Méthode de Ward
	Centrer : Non
	Réduire : Non
	Troncature : Automatique
	Statistiques descriptives :
	Variable	Observations	Obs. avec données manquantes	Obs. sans données manquantes	Minimum	Maximum	Moyenne	Ecart-type
	clr.Ca	142	0	142	-0.520089	1.10546	0.162189	0.280697
	clr.Mg	142	0	142	-2.07448	0.256751	-0.686147	0.416067
	clr.Na	142	0	142	-1.05615	1.61578	0.456077	0.363286
	clr.K	142	0	142	-4.14473	-0.627006	-2.29238	0.713114
	clr.HCO_3	142	0	142	-1.90324	1.89878	0.0632018	0.535867
	clr.Cl	142	0	142	-1.10184	2.14808	0.907164	0.382347
	clr.SO_4	142	0	142	0.417724	2.54193	1.3899	0.274741
	Statistiques des noeuds :
	Noeud	Niveau	Poids	Objets	Fils gauche	Fils droit
	13	954.235	7	7	4	12
	12	291.297	6	6	11	10
	11	79.4851	3	3	2	9
	10	66.8744	3	3	8	7
	9	22.5106	2	2	1	5
	8	21.2545	2	2	3	6
	Décomposition de la variance pour la classification optimale :
	Intra-classe	36.8798
	Inter-classes	202.396
	Totale	239.276
	Barycentres des classes :
	Classe	Obs1	Obs2	Obs3	Obs4	Obs5	Obs6	Obs7	Obs8	Obs9	Obs10	Obs11	Obs12	Obs13	Obs14	Obs15	Obs16	Obs17	Obs18	Obs19	Obs20	Obs21	Obs22	Obs23	Obs24	Obs25	Obs26	Obs27	Obs28	Obs29	Obs30	Obs31	Obs32	Obs33	Obs34	Obs35	Obs36	Obs37	Obs38	Obs39	Obs40	Obs41	Obs42	Obs43	Obs44	Obs45	Obs46	Obs47	Obs48
	1	0.555846	0.554724	-0.211489	0.848198	0.273971	0.596818	0.737656	0.167709	0.459702	0.797092	0.420288	0.599793	-0.0187101	-0.0592464	0.0412765	1.41607	0.340845	0.629556	0.0268197	0.273335	0.200343	1.24471	0.185808	0.23143	0.566826	0.855288	0.21358	0.096442	-0.0605368	-0.0595271	-0.0498846	0.0091068	-0.0550493	-0.218843	-0.109017	-0.163159	-0.0932823	0.133007	0.123227	0.0883042	0.154618	0.246922	0.257942	0.251124	0.102571	0.100913	0.164737	0.447683
	2	-0.441927	-0.477282	0.102303	-0.681038	-0.438675	-0.0498382	-0.481563	-0.202264	-0.00432719	-0.174472	0.0849246	0.00415073	0.256751	-0.524003	-0.508471	-0.489571	-0.287083	-0.451186	-0.109727	-0.0857527	-0.432269	-0.588635	-0.671585	-0.485956	-0.520113	-0.409093	-0.697388	-0.34509	-0.0934837	0.0132962	-0.086323	-0.145361	-0.195774	-0.162506	-0.184681	-0.0389306	-0.183545	-0.783818	-0.718158	-0.683798	-0.744236	-0.760196	-0.749689	-0.765914	-0.772153	-0.806863	-0.830918	-0.833981
	3	0.583109	0.767624	0.889129	0.284508	1.16396	0.367064	0.423825	0.641735	0.719875	0.315185	0.683629	0.675949	1.30847	1.39809	1.36693	-0.302134	1.01691	0.794851	0.912597	1.01151	0.873589	0.100479	0.934131	0.866245	0.603997	0.383198	0.788111	0.943492	0.971321	0.952817	0.943791	0.888201	0.877648	0.921351	0.915792	0.925911	0.865075	0.926115	0.968215	0.919395	1.05367	0.909444	0.913215	0.993472	0.87356	1.0402	0.98611	0.785936
	4	-2.41909	-2.93504	-2.34671	-1.86888	-3.60113	-2.24499	-2.26522	-2.05836	-3.0747	-2.36527	-2.97639	-3.23158	-4.14473	-3.55177	-3.67488	-1.43617	-3.44533	-3.19248	-2.6817	-3.49544	-2.58919	-2.20223	-2.50243	-2.57564	-2.42553	-2.45108	-2.09411	-2.67827	-2.6994	-2.75269	-2.64528	-2.53745	-2.32707	-2.16386	-2.34466	-2.41249	-2.22512	-2.26054	-2.43294	-2.25099	-2.72601	-2.46198	-2.50584	-2.71675	-2.05367	-2.51556	-2.45689	-2.41919
	Distances entre les barycentres des classes :
		1	2	3	4
	1	0	10.9191	11.3227	30.6275
	2	10.9191	0	20.1413	22.5474
	3	11.3227	20.1413	0	39.4375
	4	30.6275	22.5474	39.4375	0
	Objets centraux :
	Classe	Obs1	Obs2	Obs3	Obs4	Obs5	Obs6	Obs7	Obs8	Obs9	Obs10	Obs11	Obs12	Obs13	Obs14	Obs15	Obs16	Obs17	Obs18	Obs19	Obs20	Obs21	Obs22	Obs23	Obs24	Obs25	Obs26	Obs27	Obs28	Obs29	Obs30	Obs31	Obs32	Obs33	Obs34	Obs35	Obs36	Obs37	Obs38	Obs39	Obs40	Obs41	Obs42	Obs43	Obs44	Obs45	Obs46	Obs47	Obs48
	1 (clr.Ca)	0.604041	0.825609	-0.165279	0.197981	0.332932	1.10546	0.361079	0.342504	0.536215	0.604162	0.358195	0.534258	0.418429	0.191417	0.155568	0.933358	0.614601	0.630943	0.360436	0.633193	0.156659	0.835323	0.0180721	0.0726199	0.200545	0.281506	0.171889	-0.202303	-0.11669	-0.237545	-0.169313	-0.168911	-0.200378	-0.277348	-0.198919	-0.266743	-0.219263	0.0733204	0.158799	0.159485	0.126671	0.0923405	0.102933	0.110342	0.09651	0.135847	0.0539179	0.152989
	2 (clr.Mg)	-0.441927	-0.477282	0.102303	-0.681038	-0.438675	-0.0498382	-0.481563	-0.202264	-0.00432719	-0.174472	0.0849246	0.00415073	0.256751	-0.524003	-0.508471	-0.489571	-0.287083	-0.451186	-0.109727	-0.0857527	-0.432269	-0.588635	-0.671585	-0.485956	-0.520113	-0.409093	-0.697388	-0.34509	-0.0934837	0.0132962	-0.086323	-0.145361	-0.195774	-0.162506	-0.184681	-0.0389306	-0.183545	-0.783818	-0.718158	-0.683798	-0.744236	-0.760196	-0.749689	-0.765914	-0.772153	-0.806863	-0.830918	-0.833981
	3 (clr.Cl)	0.45259	0.392052	0.774185	-0.651006	1.18039	-1.10184	0.162998	0.278282	0.551636	-0.0249405	0.703563	-0.00176645	1.47567	1.70086	1.70744	-0.331165	0.96675	0.782584	0.755773	0.71858	1.03189	0.787232	0.965007	0.832593	0.512307	0.090988	0.852536	1.07636	1.10618	1.18633	1.06758	0.996895	1.04355	0.962819	1.05868	1.02254	1.08956	0.937318	1.13693	1.13971	1.15724	0.945851	0.946828	1.03457	1.01524	1.22004	1.04967	0.756365
	4 (clr.K)	-2.41909	-2.93504	-2.34671	-1.86888	-3.60113	-2.24499	-2.26522	-2.05836	-3.0747	-2.36527	-2.97639	-3.23158	-4.14473	-3.55177	-3.67488	-1.43617	-3.44533	-3.19248	-2.6817	-3.49544	-2.58919	-2.20223	-2.50243	-2.57564	-2.42553	-2.45108	-2.09411	-2.67827	-2.6994	-2.75269	-2.64528	-2.53745	-2.32707	-2.16386	-2.34466	-2.41249	-2.22512	-2.26054	-2.43294	-2.25099	-2.72601	-2.46198	-2.50584	-2.71675	-2.05367	-2.51556	-2.45689	-2.41919
	Distances entre les objets centraux :
		1 (clr.Ca)	2 (clr.Mg)	3 (clr.Cl)	4 (clr.K)
	1 (clr.Ca)	0	11.8658	11.0074	30.8892
	2 (clr.Mg)	11.8658	0	20.2985	22.5474
	3 (clr.Cl)	11.0074	20.2985	0	39.4375
	4 (clr.K)	30.8892	22.5474	39.4375	0
	Résultats par classe :
	Classe	1	2	3	4
	Objets	2	1	3	1
	Somme des poids	2	1	3	1
	Variance intra-classe	22.5106	0	44.0645	0
	Distance minimale au barycentre	3.35489	0	2.93748	0
	Distance moyenne au barycentre	3.35489	0	5.17453	0
	Distance maximale au barycentre	3.35489	0	6.67704	0
		clr.Ca	clr.Mg	clr.Na	clr.K
		clr.HCO_3		clr.Cl
				clr.SO_4
	Résultats par objet :
	Observation	Classe
	clr.Ca	1
	clr.Mg	2
	clr.Na	3
	clr.K	4
	clr.HCO_3	1
	clr.Cl	3
	clr.SO_4	3
[truncated: 144 more columns]

## Sheet: page 5
Table S23.The data used to construct the conventional LL diagram
Nom	(HCO3/r-)*50	(Na+k/r+)*50			Nom	(HCO3/r-)*50	(Na+k/r+)*50			Nom	(HCO3/r-)*50	(Na+k/r+)*50			Nom	(Na+k/r+)*50	(HCO3/r-)*50
LAG 19	5.74424	16.6606	Hassi R'mel		El-Assafia 1	7.68709	9.44762	Atlas mt		Tim 01	7.91642	29.5008			2	23.2197	3.84849
LAG 20	23.236	5.01898			Djebel Makrane (U1)	5.25939	10.5142	recharge		Tim 02	4.65718	28.961			7	25.6536	3.41294
LAG 21	6.9505	23.5223	Hassi Delaa		LAG 01	3.20773	13.831			Tim 03	2.78559	28.7627			9	26.5031	3.22762
LAG 22	7.25262	20.0475			LAG 02	22.8216	18.4617			Tim 04	10.1629	28.3886			11	26.1411	3.4072
LAG 23	13.0108	15.3501			LAG 03	4.63934	20.6004	Atlas mt		Tim 05	3.29751	24.2012			12	28.4053	5.94236
LAG 24	21.7272	14.006			LAG 04	3.06829	6.40703	recharge		Tim 06	8.73703	19.106			16	18.2298	4.43986
Hassi-Dalaa	6.74764	19.1296			LAG 05	15.7021	12.016			Tim 07	11.5586	17.6578			18	23.1473	4.95875
FX1	6.6224	20.6817			LAG 06	4.42192	11.0994			Tim 08	4.40361	31.8126			19	23.6782	4.69626
FX2	4.47209	18.4553	This study		LAG 07	5.89572	8.78786			Tim 09	7.5347	31.8517			22	24.8861	4.28054
FX3	5.06713	18.0117			LAG 08	12.6509	6.88839			Tim 10	3.68543	24.437			23	24.1885	4.4099
NK1	4.76405	17.6158			LAG 09	7.49072	9.63468	Laghouat		Tim 11	2.87646	23.629			24	27.6284	5.28032
SM5	5.70232	18.0725			LAG 10	7.8866	11.3816			Tim 12	5.66285	25.6908	Timimoun		26	24.0964	3.79858
CVZGuerrara	5.24036	18.3725			LAG 11	1.9203	14.844			Tim 13	11.8102	27.7886	Gourara		14	24.6339	6.46078
GTF	4.01335	19.0819			LAG 12	2.35652	26.5944			Tim 14	8.29598	20.4349			G2	18.6529	3.29715
FS	4.5899	18.7014			LAG 13	3.0491	26.9016			Tim 15	6.14925	29.4182			Kh1	19.1544	3.16776
DR	4.25506	17.2778			LAG 14	33.931	5.55821			Tim 16	2.35408	23.3867			M3	19.7691	4.05638
KN	4.88746	17.5952			LAG 15	3.87136	13.1084			Tim 17	6.63561	30.6242			Tg01	19.88	4.0791
Gr01	5.90465	22.906	Guerrara		LAG 16	7.73782	11.4274			Tim 18	3.99992	23.1759			Og01	28.0199	4.20087
Gr02	5.09771	22.1011			LAG 17	3.05051	13.5473			Tim 19	6.62117	20.5202			Og02	22.5892	5.379
Gr03	4.87598	20.8459			LAG 18	3.11254	12.2677			Tim 20	0.334563	42.4597			El-Mir	19.597	4.30084
Zf01	5.33115	24.3395	Zelfana							Tim 21	1.87739	25.5943			Blidet Omar 1989	18.6025	4.67045
Zf02	7.25882	22.6497								Adr 01	9.52657	27.2186	Adrar		Ain-Sahara	19.8105	3.89992
Zf03	7.30232	22.5326								Adr 02	3.64811	35.642			Sidi-Slimane 1	20.1137	4.38625
Zf04	6.80981	23.9722								Adr 03	3.36504	29.4006			Sidi-Slimane 2	20.1294	4.64779
Guerrara:Laameyed	5.6204	21.6429			Nom	(HCO3/r-)*50	(Na+k/r+)*50			Adr 04	4.61778	27.8462			Meggarine	20.1956	3.48229
Zelfana 1	4.97922	25.5651			Tid1	2.93751	29.0544			Adr 05	4.97525	24.8645			Ain-Choucha	19.5318	5.29157
Zelfana 8 (Fedj Enaam)	6.26719	25.0766			Tid2	2.80775	28.7065			Adr 06	5.32349	24.0694	Touat		Etteibat	20.8901	3.50273
Br01	10.4719	20.7068	berriane		Tid3	3.75601	28.3608	In Ghar		Adr 07	7.18568	25.624			Sehane El Berry	34.8241	2.51955
Br02	9.91172	20.8702			Tid4	2.85109	29.0066			Adr 08	5.72635	24.5902			El Oued	20.5301	4.04721
Br03	9.29289	18.6114			Tid5	6.83338	28.2284			Adr 09	6.44261	23.6961			Sidi-Mahdi	20.0434	4.25505
GHA 02	8.64687	17.3035	berriane		Tid6	4.6984	30.0981			Adr 10	4.20042	31.6875			Khchem Er'rih	22.6829	5.27177
GHA 03	8.44124	20.7042			Tid7	2.21657	30.57			Adr 11	3.59322	24.8932			Hassi Ben Abdelleh 3	22.2586	5.30615
GHA 04	9.03462	18.6671			Tid8	5.26613	27.144			Adr 12	0.407657	26.3338			Hassi Ben Abdelleh 4	23.2199	5.7157
Berriane 2	10.429	21.583			Tid9	2.51819	30.6074			Adr 13	3.45184	24.2407			M'RARA MR3	18.7182	3.35856
Bn01	4.68436	24.9963			Tid27	3.24503	29.7509			Adr 14	2.22791	27.5865			M'RARA MR4	17.2437	3.51484
Bn02	5.64847	23.6963			Tid10	5.50836	26.8722			Adr 15	2.87042	31.516			NEFTA CI 1	24.3726	2.25923
Dy01	6.98087	21.8424			Tid11	5.26546	26.3497	Foggaret		Adr 16	5.91167	27.3041			NEFTA CI 2	22.3462	2.77252
Dy02	4.27249	23.1348			Tid12	5.0558	24.0614	ezzaouia		Adr 17	11.8001	27.5903			TOZEUR CI 1	34.7947	0.40803
Gd01	5.13008	23.373			Tid13	3.97852	22.8001			Adr 18	12.1688	28.6965			TOZEUR CI 2	28.5725	2.16509
Gd02	4.80731	21.069	Ghardaia		Tid14	6.16172	26.5761			Adr 19	6.49952	34.3431			TOZEUR CI 3
Gd03	3.70987	24.8929			Tid15	4.73743	26.8576			Adr 20	5.59674	25.2505			EL-HAMMA C I2	31.2911	4.17467
Gd04	5.04742	22.2197			Tid16	3.46853	26.1977			Reg 01	6.38142	28.3547	Reggane		EL-HAMMA C I4	29.207	2.08952
Gd05	5.34891	21.7252			Tid17	2.75799	25.8982			Reg 02	1.39803	25.6501	Touat		TAZRARIT CI 1	38.7425	0.488259
Gd06	4.79272	24.565			Tid18	3.0843	26.8924	In Salah		Reg 03	3.24667	25.4816			CEDADA CI 2	22.8521	4.53007
Tf01	4.82691	20.4359			Tid19	3.78368	25.0823			Krz 01	30.3815	11.0803	Kerzaz		CHORFA CI 4	22.2637	3.20825
GHA 01	4.61626	16.3626	Ghardaia		Tid20	3.45863	24.4378			Krz02	18.7149	12.6778	Saoura		ZOUIA CI 5	21.6475	3.05723
Bouheraroua	4.49221	20.5718			Tid21	2.93405	26.6371								MANSOURA CI 3	23.9601	1.9077
Bensmara 1	5.77348	19.0996			Tid22	3.78966	24.723								MANSOURA CI 13	23.3235	3.36124
Daia Ben Dahoua	4.81972	21.2486			Tid24	3.19367	27.9997								KEBILI CI 10	24.4786	3.04263
Laroui	8.79545	19.1116			Tid25	3.67677	28.9357								KEBILI CI 16	27.8064	2.93609
Mt00	3.49509	26.7228			Tid26	3.21962	27.8325								TAOUARGHA CI 2	22.5818	3.37777
Mt01	7.75032	23.7817	Metlili		Tid28	2.67903	27.8017								EL BHAIER CI 9	22.1283	2.74718
Mt02	3.85955	19.7837			Tid29	2.63371	27.3672								LIMAGUES CI 8	22.9311	2.47785
Mt03	6.16716	20.1594			Tid30	2.91285	27.4147								DEBABCHA CI 14	21.2939	3.06523
Mt04	6.68426	20.3933			Aou 01	3.86732	26.6736								SOUK EL AHAD CI 17	23.4247	3.14227
Mt05	9.39034	21.9997			Aou 02	2.91762	27.7037	Aoulef							MENCHIA CI 6	28.9972	0.691171
Mr01	8.87792	23.1425	Mansoura		Aou 03	5.09001	24.8019								SEFTIMI	22.2437	3.21526
Mr02	9.75461	25.0617			Aou 04	8.04711	25.1679
Mr03	9.60067	24.6819			Aou 05	3.47453	29.4258
Sb01	4.9634	20.3702	Sebseb
Sb02	5.37405	21.073
Sb03	5.65676	22.1624
Sb04	6.52529	19.4619
Hf01	11.2967	27.0617	Hassi fehal
Hf02	7.67427	17.7971
Elm 01	10.5887	12.2855	El Golea
Elm 02	35.9042	22.8577
Gl01	11.9377	11.6066	El Golea
Gl02	12.9919	11.2634
Gl03	12.0616	9.58327
Gl04	12.3605	9.02682
Gl05	13.159	12.9744
Gl06	13.0256	13.3888
Gl07	14.1029	13.9866
Gl08	13.2331	11.9367
Gl09	13.1957	13.7373
Gl10	20.7788	16.4705
Gl11	26.194	18.9442
Gl12	36.2416	27.0436
Gl13	34.3159	26.4761
Gl14	32.0336	22.2519
Hg01	27.612	19.1071	Hassi Gara
Hg02	6.87368	8.71057
Hg03	13.7944	14.6933
Hg04	15.9591	13.5011
Hg05	17.4824	13.013
kb602	16.2905	15.2987	Krechba
kb603	14.7268	18.4966
kb604	18.6079	15.0477
kb605	18.3482	15.1068
kb606	15.7883	15.6839
lnb 01	16.3264	18.7123	Tadmait

## Sheet: Page 6
Table S24. The data used to construct the new LL diagram
Occidental Basin						Oriental Basin
Site		log(Na*K)/(Ca*Mg)				Site		log(Na*K)/(Ca*Mg)
LAG 19	-2.46339	-0.910882				LAG 19	-2.46339	-0.910882
LAG 20	-1.232	-1.52223				LAG 20	-1.232	-1.52223
LAG 21	-2.32442	-0.535696				LAG 21	-2.32442	-0.535696
LAG 22	-2.29729	-0.745534				LAG 22	-2.29729	-0.745534
LAG 23	-1.84825	-0.885817				LAG 23	-1.84825	-0.885817
LAG 24	-1.33694	-0.995809				LAG 24	-1.33694	-0.995809
Hassi-Dalaa	-2.38049	-0.548595				Hassi-Dalaa	-2.38049	-0.548595
FX1	-2.48097	-0.730356				FX1	-2.48097	-0.730356
FX2	-2.65978	-0.886022				FX2	-2.65978	-0.886022
FX3	-2.59007	-0.907116				FX3	-2.59007	-0.907116
NK1	-2.6175	-0.882459				NK1	-2.6175	-0.882459
SM5	-2.50201	-0.810494				SM5	-2.50201	-0.810494
CVZGuerrara	-2.58128	-0.69477				CVZGuerrara	-2.58128	-0.69477
GTF	-2.76237	-0.583674				GTF	-2.76237	-0.583674
FS	-2.65348	-0.691439				FS	-2.65348	-0.691439
DR	-2.72113	-0.777374				DR	-2.72113	-0.777374
KN	-2.64134	-0.679964				KN	-2.64134	-0.679964
Gr01	-2.50522	-0.438927				Gr01	-2.50522	-0.438927
Gr02	-2.57037	-0.571465				Gr02	-2.57037	-0.571465
Gr03	-2.59966	-0.549879				Gr03	-2.59966	-0.549879
Zf01	-2.52805	-0.603539				Zf01	-2.52805	-0.603539
Zf02	-2.3145	-0.541986				Zf02	-2.3145	-0.541986
Zf03	-2.30949	-0.569166				Zf03	-2.30949	-0.569166
Zf04	-2.3592	-0.604307				Zf04	-2.3592	-0.604307
Guerrara:Laameyed	-2.50774	-0.405911				Guerrara:Laameyed	-2.50774	-0.405911
Zelfana 1	-2.55945	-0.455953				Zelfana 1	-2.55945	-0.455953
Zelfana 8 (Fedj Enaam)	-2.42057	-0.4286				Zelfana 8 (Fedj Enaam)	-2.42057	-0.4286
Br01	-2.05944	-0.585949				Br01	-2.05944	-0.585949
Br02	-2.07039	-0.63768				Br02	-2.07039	-0.63768
Br03	-2.18644	-0.666074				Br03	-2.18644	-0.666074
GHA 02	-2.1665	-0.791694				GHA 02	-2.1665	-0.791694
GHA 03	-2.08699	-0.404279				GHA 03	-2.08699	-0.404279
GHA 04	-2.07898	-0.716068				GHA 04	-2.07898	-0.716068
Berriane 2	-2.0249	-0.371036				Berriane 2	-2.0249	-0.371036
Bn01	-2.59082	-0.829882				Bn01	-2.59082	-0.829882
Bn02	-2.48736	-0.81065				Bn02	-2.48736	-0.81065
Dy01	-2.29441	-1.2176				Dy01	-2.29441	-1.2176
Dy02	-2.64903	-1.04107				Dy02	-2.64903	-1.04107
Gd01	-2.51574	-1.10963				Gd01	-2.51574	-1.10963
Gd02	-2.57509	-1.02407				Gd02	-2.57509	-1.02407
Gd03	-2.75366	-0.945274				Gd03	-2.75366	-0.945274
Gd04	-2.54706	-1.05474				Gd04	-2.54706	-1.05474
Gd05	-2.52496	-0.927417				Gd05	-2.52496	-0.927417
Gd06	-2.59528	-0.876422				Gd06	-2.59528	-0.876422
Tf01	-2.58634	-1.0227				Tf01	-2.58634	-1.0227
GHA 01	-2.54727	-1.06248				GHA 01	-2.54727	-1.06248
Bouheraroua	-2.61715	-0.807076				Bouheraroua	-2.61715	-0.807076
Bensmara 1	-2.46367	-0.792317				Bensmara 1	-2.46367	-0.792317
Daia Ben Dahoua	-2.55987	-0.775569				Daia Ben Dahoua	-2.55987	-0.775569
Laroui	-2.2012	-0.467302				Laroui	-2.2012	-0.467302
Mt00	-2.83971	-0.530735				Mt00	-2.83971	-0.530735
Mt01	-2.25506	-0.729031				Mt01	-2.25506	-0.729031
Mt02	-2.67333	-1.12091				Mt02	-2.67333	-1.12091
Mt03	-2.34067	-1.07625				Mt03	-2.34067	-1.07625
Mt04	-2.26922	-1.08274				Mt04	-2.26922	-1.08274
Mt05	-2.08114	-0.695776				Mt05	-2.08114	-0.695776
Mr01	-2.02256	-0.779021				El-Assafia 1	-2.19328	-1.26312
Mr02	-2.04752	-0.472686				Djebel Makrane (U1)	-2.51842	-1.43457
Mr03	-2.06181	-0.463226				LAG 01	-2.55837	-0.943553
Sb01	-2.46503	-1.31183				LAG 02	-0.914461	-0.491295
Sb02	-2.41171	-1.20856				LAG 03	-2.64404	-1.22516
Sb03	-2.37469	-1.10334				LAG 04	-2.26083	-1.58062
Sb04	-2.36572	-0.820126				LAG 05	-1.57187	-1.01213
Hf01	-1.80036	-0.301106				LAG 06	-2.44943	-1.03695
Hf02	-2.01249	-0.656885				LAG 07	-2.29379	-1.66675
Elm 01	-1.68758	-0.884044				LAG 08	-1.6296	-1.48577
Elm 02	-0.302544	0.0299167				LAG 09	-2.20087	-1.55354
Gl01	-1.63187	-0.791007				LAG 10	-2.08213	-1.59011
Gl02	-1.56643	-0.850594				LAG 11	-3.2669	-1.84752
Gl03	-1.6068	-0.979643				LAG 12	-3.00398	-0.945059
Gl04	-1.56737	-1.00444				LAG 13	-2.86293	-0.984129
Gl05	-1.50478	-0.67717				LAG 14	-0.451265	-1.24769
Gl06	-1.52046	-0.663068				LAG 15	-2.63708	-1.54474
Gl07	-1.43676	-0.630221				LAG 16	-2.45964	-1.47645
Gl08	-1.51021	-0.759996				LAG 17	-2.84634	-1.19349
Gl09	-1.50645	-0.635933				LAG 18	-2.78408	-1.65861
Gl10	-0.98596	-0.432456				2	-2.68942	-0.311754
Gl11	-0.688598	-0.271464				7	-2.77381	-0.153815
Gl12	-0.398718	0.0575643				9	-2.77837	-0.0692249
Gl13	-0.612044	0.00240753				11	-2.7366	-0.0482463
Gl14	-0.5622	-0.107869				12	-2.42915	0.163161
Hg01	-0.61255	-0.291143				16	-2.69352	-0.363006
Hg02	-2.07533	-0.808394				18	-2.53552	-0.27925
Hg03	-1.46759	-0.535594				19	-2.57859	-0.195346
Hg04	-1.35241	-0.620309				22	-2.6436	-0.0631184
Hg05	-1.26563	-0.641216				23	-2.56714	-0.0770062
kb602	-1.32421	-0.352577				24	-2.48509	0.100238
kb603	-1.42482	-0.283397				26	-2.68314	-0.275507
kb604	-1.17262	-0.390981				14	-2.45499	-0.227704
kb605	-1.20259	-0.395462				G2	-2.78998	-0.414973
kb606	-1.34755	-0.350409				Kh1	-2.86955	-0.255273
lnb 01	-1.50197	-0.367652				M3	-2.68404	-0.325762
El-Assafia 1	-2.19328	-1.26312				Tg01	-2.74077	-0.372088
Djebel Makrane (U1)	-2.51842	-1.43457				Og01	-2.74036	-0.114414
LAG 01	-2.55837	-0.943553				Og02	-2.55387	-0.280673
LAG 02	-0.914461	-0.491295				El-Mir	-2.67497	-0.332845
LAG 03	-2.64404	-1.22516				Blidet Omar 1989	-2.65314	-0.340275
LAG 04	-2.26083	-1.58062				Ain-Sahara	-2.76238	-0.317275
LAG 05	-1.57187	-1.01213				Sidi-Slimane 1	-2.6983	-0.262665
LAG 06	-2.44943	-1.03695				Sidi-Slimane 2	-2.67104	-0.289293
LAG 07	-2.29379	-1.66675				Meggarine	-2.85189	-0.337356
LAG 08	-1.6296	-1.48577				Ain-Choucha	-2.56735	-0.291089
LAG 09	-2.20087	-1.55354				Etteibat	-2.80371	-0.259025
LAG 10	-2.08213	-1.59011				Sehane El Berry	-2.94596	0.5209
LAG 11	-3.2669	-1.84752				El Oued	-2.73077	-0.165777
LAG 12	-3.00398	-0.945059				Sidi-Mahdi	-2.69371	-0.296318
LAG 13	-2.86293	-0.984129				Khchem Er'rih	-2.56946	-0.202041
LAG 14	-0.451265	-1.24769				Hassi Ben Abdelleh 3	-2.55292	-0.220834
LAG 15	-2.63708	-1.54474				Hassi Ben Abdelleh 4	-2.4993	-0.166121
LAG 16	-2.45964	-1.47645				M'RARA MR3	-2.72924	-0.330457
LAG 17	-2.84634	-1.19349				M'RARA MR4	-2.71716	-0.385467
LAG 18	-2.78408	-1.65861				NEFTA CI 1	-3.11091	0.130214
Tid1	-2.85234	0.0922972				NEFTA CI 2	-2.84695	0.164659
Tid2	-2.87908	0.0731459				TOZEUR CI 1	-4.10231	0.051565
Tid3	-2.7612	0.0663748				TOZEUR CI 2	-3.10086	0.338363
Tid4	-2.87987	0.07744				TOZEUR CI 3	-2.9644	0.0360534
Tid5	-2.24874	0.220472				EL-HAMMA C I2	-2.76035	0.521284
Tid6	-2.49288	0.304847				EL-HAMMA C I4	-3.16492	0.504047
Tid7	-3.08513	0.10406				TAZRARIT CI 1	-3.54641	1.19808
Tid8	-2.51119	0.0654958				CEDADA CI 2	-2.72828	0.373537
Tid9	-2.94468	0.193347				CHORFA CI 4	-2.8611	-0.100738
Tid27	-2.79377	0.129525				ZOUIA CI 5	-2.89372	-0.144109
Tid10	-2.45646	-0.169285				MANSOURA CI 13	-2.84233	-0.0692342
Tid11	-2.49308	-0.191807				KEBILI CI 10	-2.90358	-0.0322482
Tid12	-2.52491	-0.312027				KEBILI CI 16	-2.89524	0.134229
Tid13	-2.56365	-0.344473				EL BHAIER CI 9	-2.96373	-0.12446
Tid14	-2.42485	-0.187575				LIMAGUES CI 8	-2.98765	-0.100875
Tid15	-2.55285	-0.222755				DEBABCHA CI 14	-2.88262	-0.153539
Tid16	-2.7617	0.0080463				SOUK EL AHAD CI 17	-2.80505	-0.0156098
Tid17	-2.93118	-0.0406083				MENCHIA CI 6	-3.57057	0.481936
Tid18	-2.85341	0.0119074				SEFTIMI	-2.8728	-0.120776
Tid19	-2.80764	-0.22348
Tid20	-2.84716	-0.215464
Tid21	-2.87962	0.0305344
Tid22	-2.81786	-0.230389
Tid24	-2.91965	0.137719
Tid25	-2.84416	0.271465
Tid26	-2.89701	0.138311
Tid28	-2.89972	0.0338053
Tid29	-2.94631	0.0668381
Tid30	-2.86761	0.040704
Aou 01	-2.64063	-0.00732386
Aou 02	-2.86125	-0.051825
Aou 03	-2.43893	-0.0403462
Aou 04	-2.23448	0.00862531
Aou 05	-2.7635	0.0886833
Tim 01	-2.10461	0.342039
Tim 02	-2.4772	0.390405
Tim 03	-2.79492	0.404082
Tim 04	-1.99486	0.182031
Tim 05	-2.72124	0.00555536
Tim 06	-2.04458	-0.154413
Tim 07	-1.77501	-0.373243
Tim 08	-2.79253	0.39517
Tim 09	-2.32689	0.454979
Tim 10	-2.97207	0.0631007
Tim 11	-2.78003	0.0817652
Tim 12	-2.36442	0.211933
Tim 13	-1.95955	0.376158
Tim 14	-1.97591	-0.0182251
Tim 15	-2.45815	0.581429
Tim 16	-2.95224	-0.0476226
Tim 17	-2.09002	0.404362
Tim 18	-2.68913	-0.388482
Tim 19	-2.16767	-0.329711
Tim 20	-3.56541	1.12233
Tim 21	-3.13151	0.0596677
Adr 01	-2.09246	0.0830269
Adr 02	-2.75439	0.560053
Adr 03	-2.78166	0.116209
Adr 04	-2.58203	0.0554579
Adr 05	-2.5573	-0.130571
Adr 06	-2.52048	-0.19108
Adr 07	-2.34024	-0.164394
Adr 08	-2.47218	-0.180196
Adr 09	-2.44364	-0.259962
Adr 10	-2.63057	0.326768
Adr 11	-2.73517	-0.230984
Adr 12	-4.1405	-0.395835
Adr 13	-2.77909	-0.308656
Adr 14	-2.99605	0.065569
Adr 15	-2.85079	0.302468
Adr 16	-2.34413	0.034412
Adr 17	-1.85006	0.024847
Adr 18	-1.90438	0.130235
Adr 19	-2.37923	0.601036
Adr 20	-2.4125	0.0146831
Reg 01	-2.48297	0.00408208
Reg 02	-3.41836	-0.270895
Reg 03	-2.90021	-0.222393
Krz 01	-1.22834	-0.871918
Krz02	-1.27889	-0.58097
